# Supplementary material
Source: HighWire-hosted journal article supplement (https://molpharm.aspetjournals.org/highwire/filestream/84007/field_highwire_adjunct_files/0/116764_Supplemental_Data_Monte_FINAL.pdf)
Supplement: 116764_Supplemental_Data_Monte_FINAL.pdf [file 116764_Supplemental_Data_Monte_FINAL.pdf]

**Investigating the influence of tracer kinetics on competition-kinetic association binding assays; identifying the optimal conditions for assessing the kinetics of low affinity compounds.**

David A Sykes, Palash Jain & Steven J Charlton

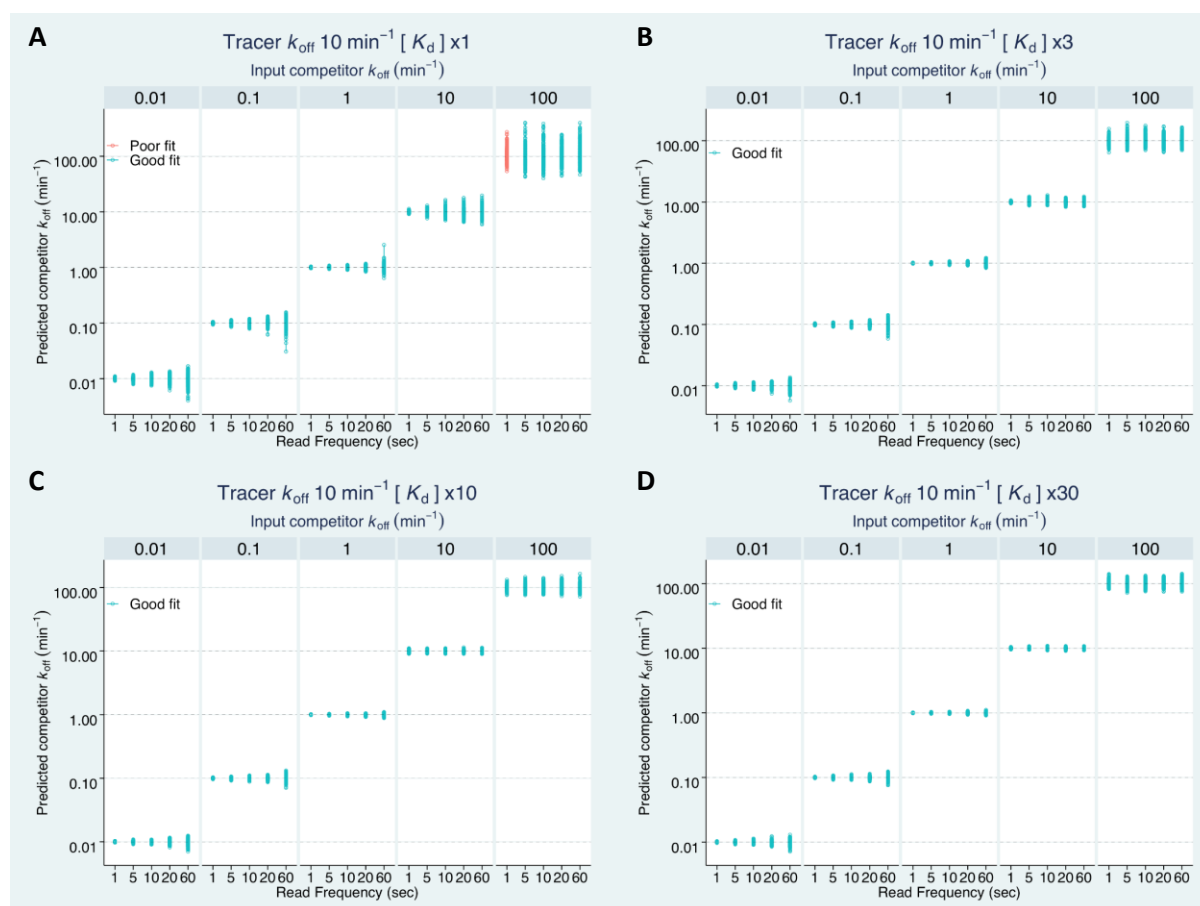

**Supplemental Figure 1.** Monte-Carlo simulation results exploring the effect of tracer kinetics and assay start and read frequency time on the accurate determination of competitor kinetic parameters representative of online addition protocol. Effect of assay read frequency on measured  $k_{off}$  of unlabelled competitor compounds with varied kinetics in competition with different concentrations of a slowly dissociating tracer with kinetic parameters;  $k_{off}$  of 10min<sup>-1</sup>,  $k_{on}$  of  $3 \times 10^7$  M<sup>-1</sup> min<sup>-1</sup>. Tracer concentrations were **(A)**  $1 \times K_d$ , **(B)**  $3 \times K_d$  **(C)**  $10 \times K_d$  and **(D)**  $30 \times K_d$ . Blue open symbols represent conditions which returned >90% reliable fits. Red open symbols

represent conditions which returned <90% reliable fits. In all cases tracer simulations were performed with an initial start time of 1sec representative of addition of receptor to a reaction containing free tracer (L) and unlabelled competitor (I), all of 200 values (minus outliers) for each simulated condition are plotted.

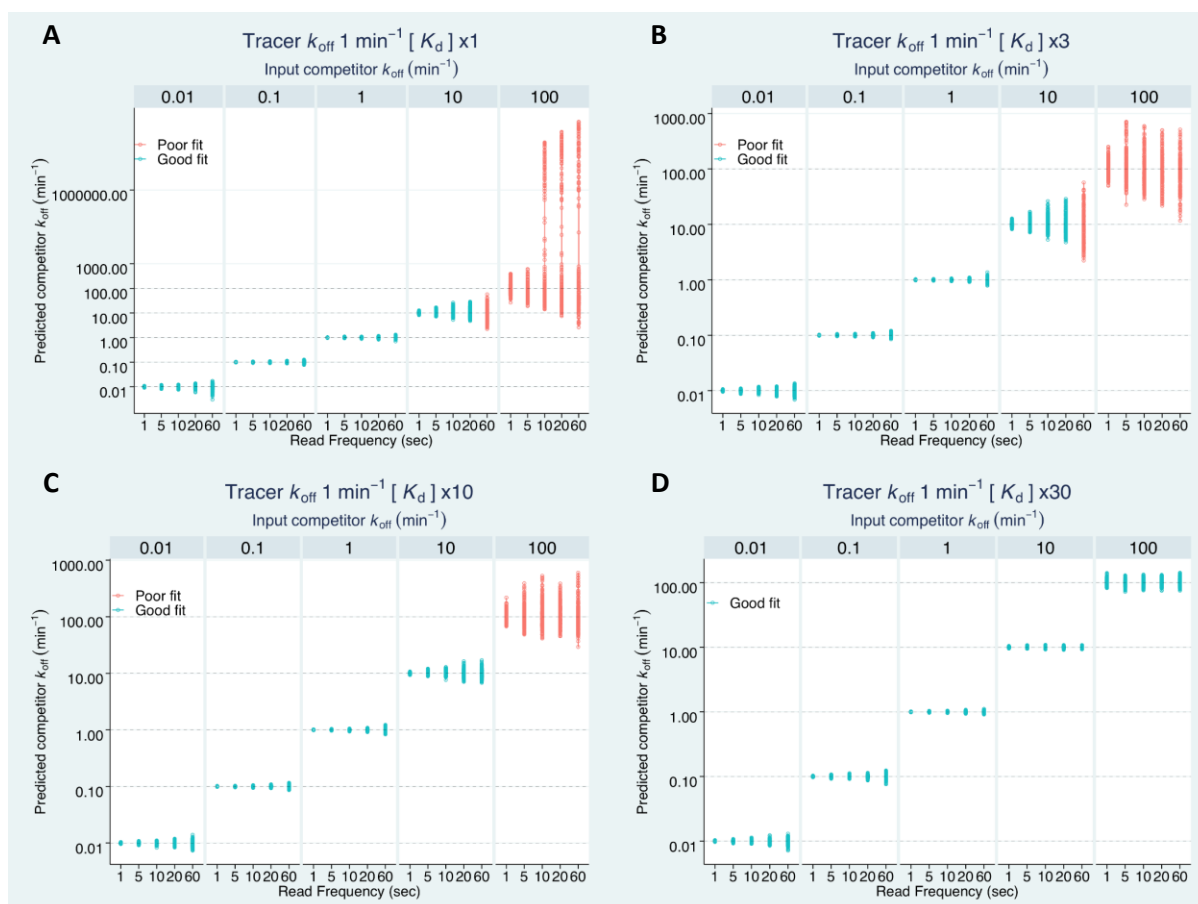

**Supplemental Figure 2.** Monte-Carlo simulation results exploring the effect of tracer kinetics and assay start and read frequency time on the accurate determination of competitor kinetic parameters representative of online addition protocol. Effect of assay read frequency on measured  $k_{off}$  of unlabelled competitor compounds with varied kinetics in competition with different concentrations of a slowly dissociating tracer with kinetic parameters;  $k_{off}$  of 1min<sup>-1</sup>,  $k_{on}$  of 1x10<sup>7</sup> M<sup>-1</sup> min<sup>-1</sup>. Tracer concentrations were **(A)** 1x  $K_d$  **(B)** 3x  $K_d$  **(C)** 10x  $K_d$  and **(D)** 30x  $K_d$ . Blue open symbols represent conditions which returned >90% reliable fits. Red open symbols represent conditions which returned <90% reliable fits. In all cases tracer simulations were performed with an initial start time of 1sec representative of addition of receptor to a reaction containing free tracer (L) and competitor (I), all of 200 values (minus outliers) for each simulated condition are plotted.

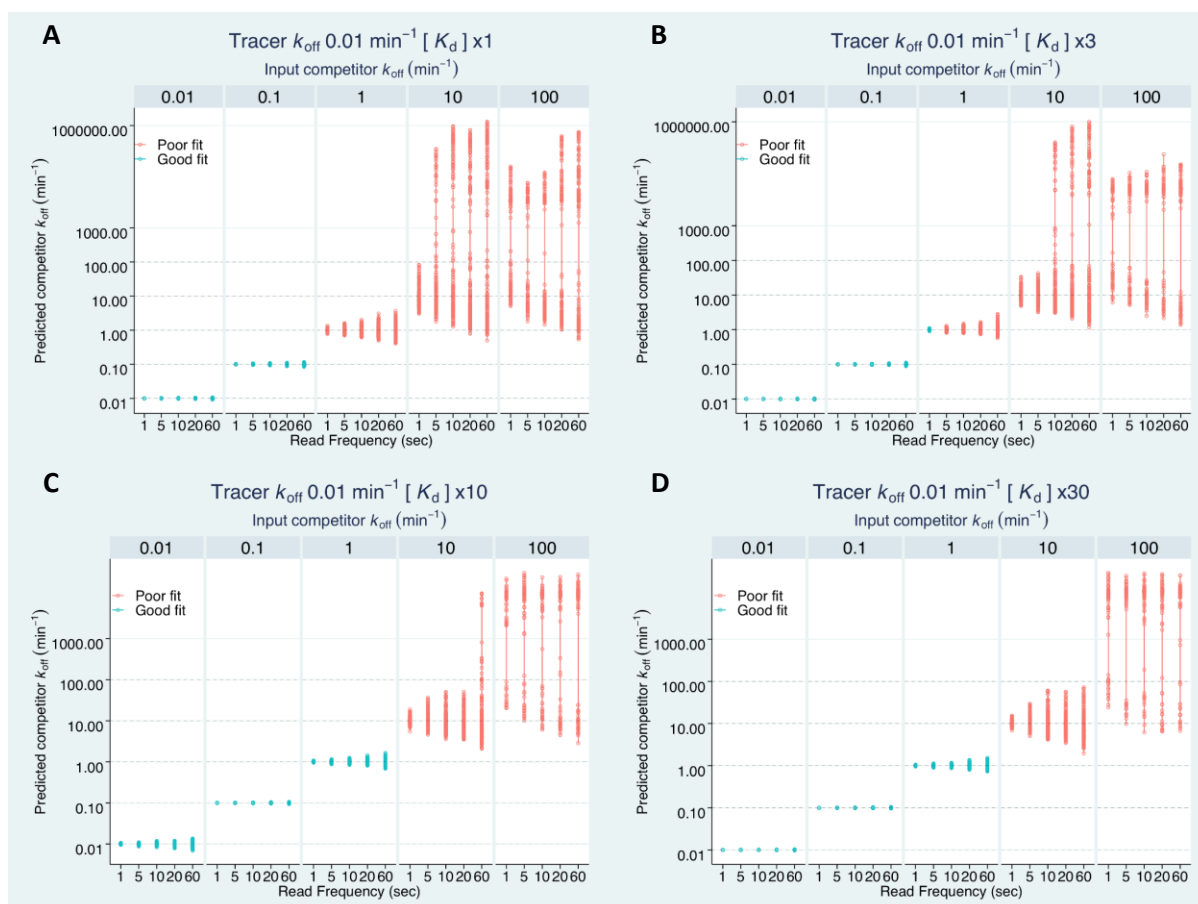

**Supplemental Figure 3.** Monte-Carlo simulation results exploring the effect of tracer kinetics and assay start and read frequency time on the accurate determination of competitor kinetic parameters representative of online addition protocol. Effect of assay read frequency on measured  $k_{off}$  of unlabelled competitor compounds with varied kinetics in competition with different concentrations of a slowly dissociating tracer with kinetic parameters;  $k_{off}$  of 0.01min<sup>-1</sup>,  $k_{on}$  of 1x10<sup>9</sup> M<sup>-1</sup> min<sup>-1</sup>. Tracer concentrations were **(A)** 1x  $K_d$  **(B)** 3x  $K_d$  **(C)** 10x  $K_d$  and **(D)** 30x  $K_d$ . Blue open symbols represent conditions which returned >90% reliable fits. Red open symbols represent conditions which returned <90% reliable fits. In all cases tracer simulations were performed with an initial start time of 1sec representative of addition of receptor to a reaction containing free tracer (L) and competitor (I), all of 200 values (minus outliers) for each simulated condition are plotted.

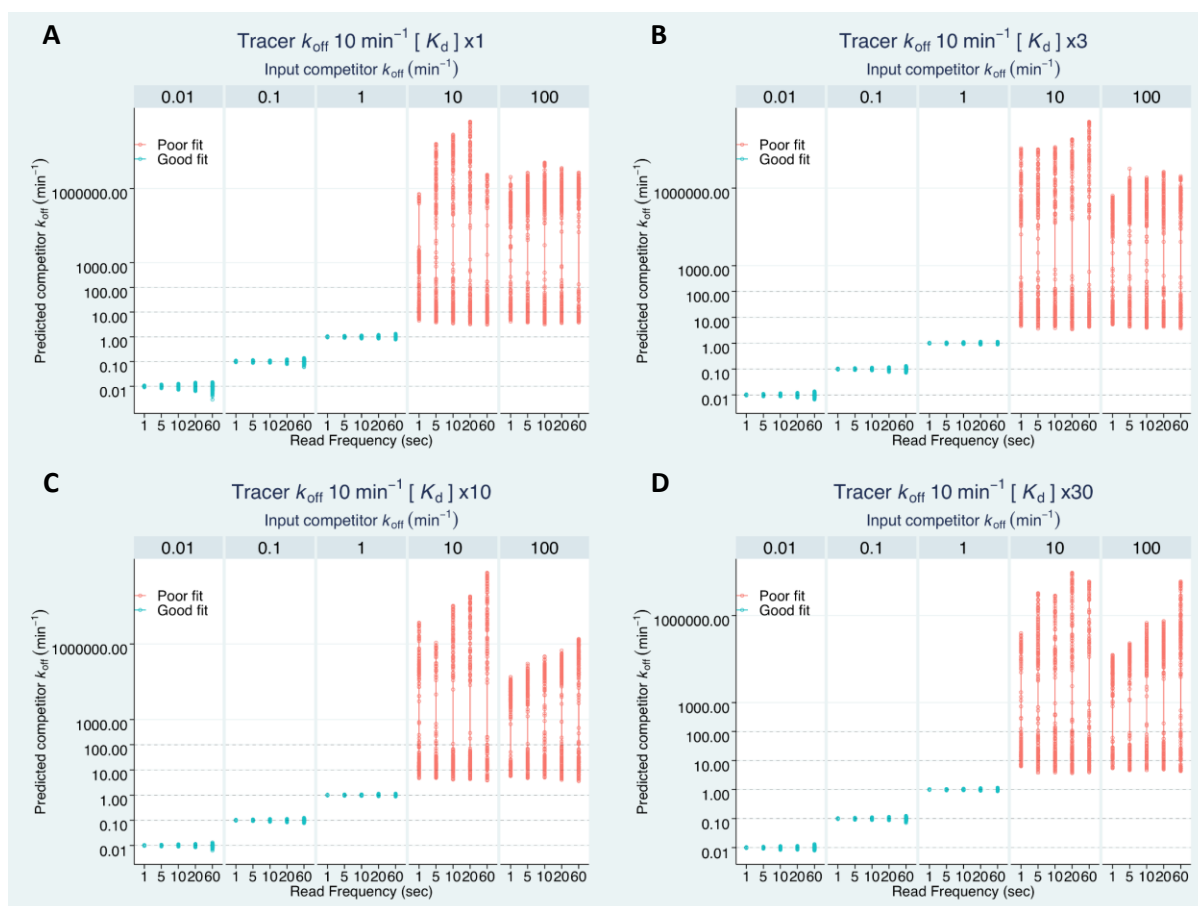

**Supplemental Figure 4.** Monte-Carlo simulation results exploring the effect of tracer kinetics and assay start and read frequency time on the accurate determination of competitor kinetic parameters representative of offline addition protocol. Effect of assay read frequency on measured  $k_{off}$  of unlabelled competitor compounds with varied kinetics in competition with different concentrations of a slowly dissociating tracer with kinetic parameters;  $k_{off}$  of 10min<sup>-1</sup>,  $k_{on}$  of 3x10<sup>7</sup> M<sup>-1</sup> min<sup>-1</sup>. Tracer concentrations were **(A)** 1x  $K_d$  **(B)** 3x  $K_d$ , **(C)** 10x  $K_d$  and **(D)** 30x  $K_d$ . Blue open symbols represent conditions which returned >90% reliable fits. Red open symbols represent conditions which returned <90% reliable fits. In all cases tracer simulations were performed with an initial start time of 30sec representative of addition of receptor to a reaction containing free tracer (L) and competitor (I), all of 200 values (minus outliers) for each simulated condition are plotted.

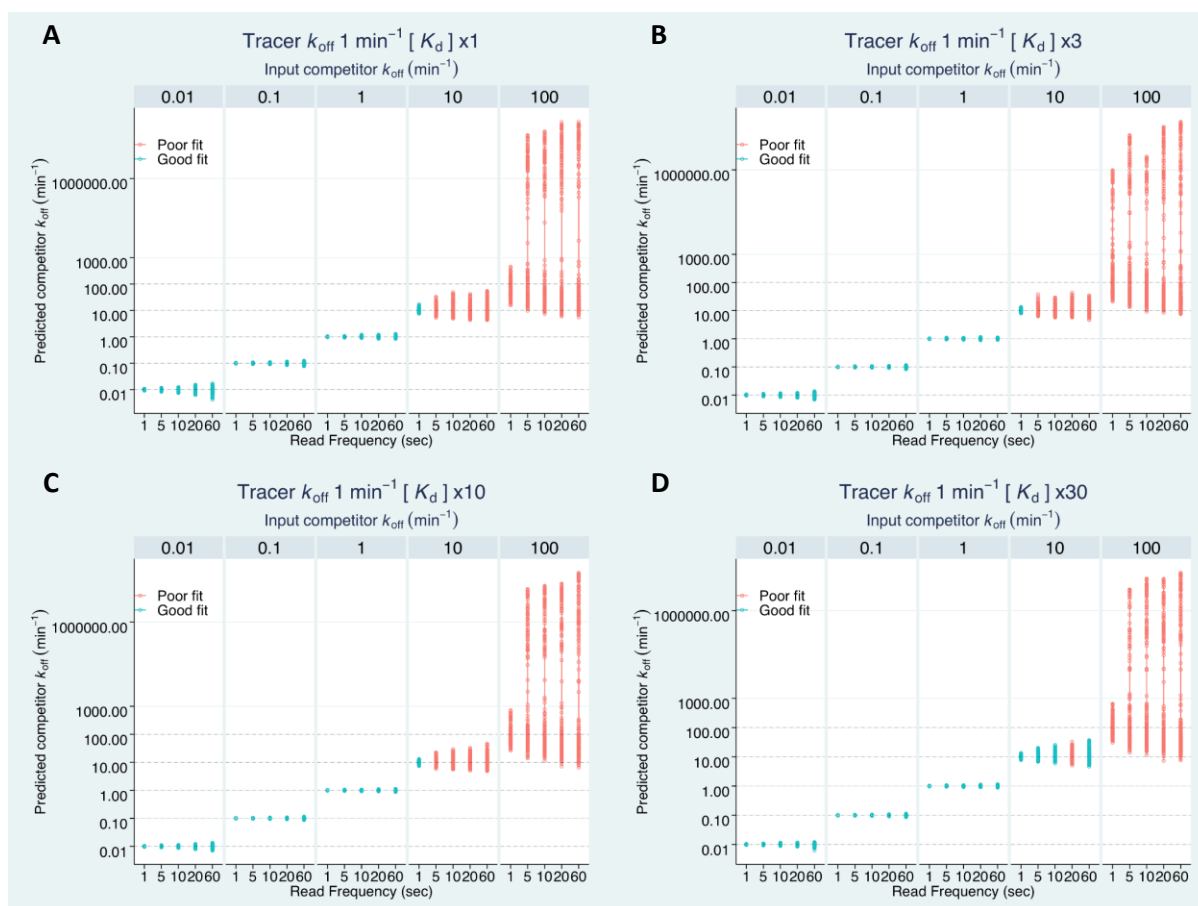

**Supplemental Figure 5.** Monte-Carlo simulation results exploring the effect of tracer kinetics and assay start and read frequency time on the accurate determination of competitor kinetic parameters representative of offline addition protocol. Effect of assay read frequency on measured  $k_{off}$  of unlabelled competitor compounds with varied kinetics in competition with different concentrations of a slowly dissociating tracer with kinetic parameters;  $k_{off}$  of 1 min<sup>-1</sup>,  $k_{on}$  of  $1 \times 10^7$  min<sup>-1</sup>. Tracer concentrations were **(A)**  $1 \times K_d$  **(B)**  $3 \times K_d$  **(C)**  $10 \times K_d$  and **(D)**  $30 \times K_d$ . Blue open symbols represent conditions which returned >90% reliable fits. Red open symbols represent conditions which returned <90% reliable fits. In all cases tracer simulations were performed with an initial start time of 30sec representative of addition of receptor to a reaction containing free tracer (L) and competitor (I), all of 200 values (minus outliers) for each simulated condition are plotted.

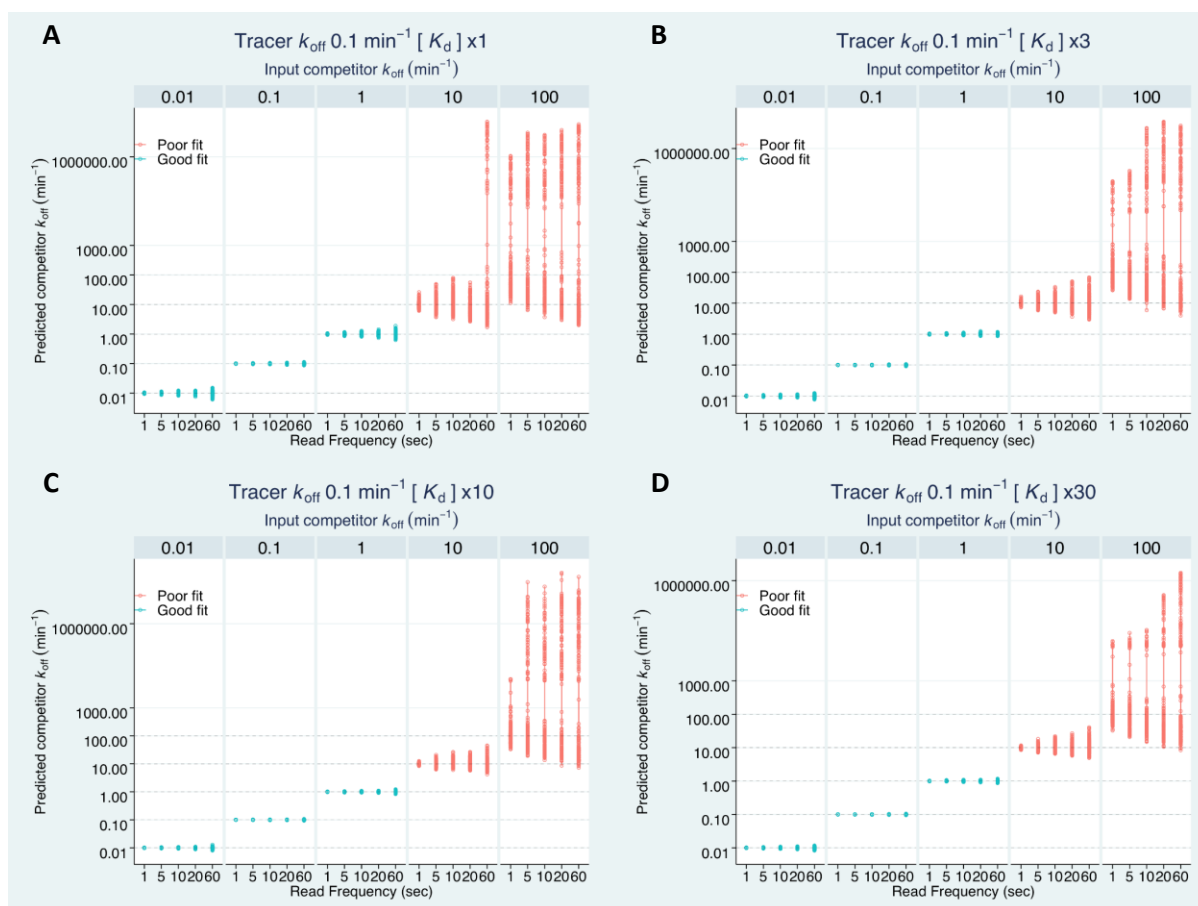

**Supplemental Figure 6.** Monte-Carlo simulation results exploring the effect of tracer kinetics and assay start and read frequency time on the accurate determination of competitor kinetic parameters representative of offline addition protocol. Effect of assay read frequency on measured  $k_{off}$  of unlabelled competitor compounds with varied kinetics in competition with different concentrations of a slowly dissociating tracer with kinetic parameters;  $k_{off}$  of 0.1min<sup>-1</sup>,  $k_{on}$  of 1x10<sup>8</sup> min<sup>-1</sup>. Tracer concentrations were **(A)** 1x  $K_d$ , **(B)** 3x  $K_d$ , **(C)** 10x  $K_d$  and **(D)** 30x  $K_d$ . Blue open symbols represent conditions which returned >90% reliable fits. Red open symbols represent conditions which returned <90% reliable fits. In all cases tracer simulations were performed with an initial start time of 30sec representative of addition of receptor to a reaction containing free tracer (L) and competitor (I), all of 200 values (minus outliers) for each simulated condition are plotted.

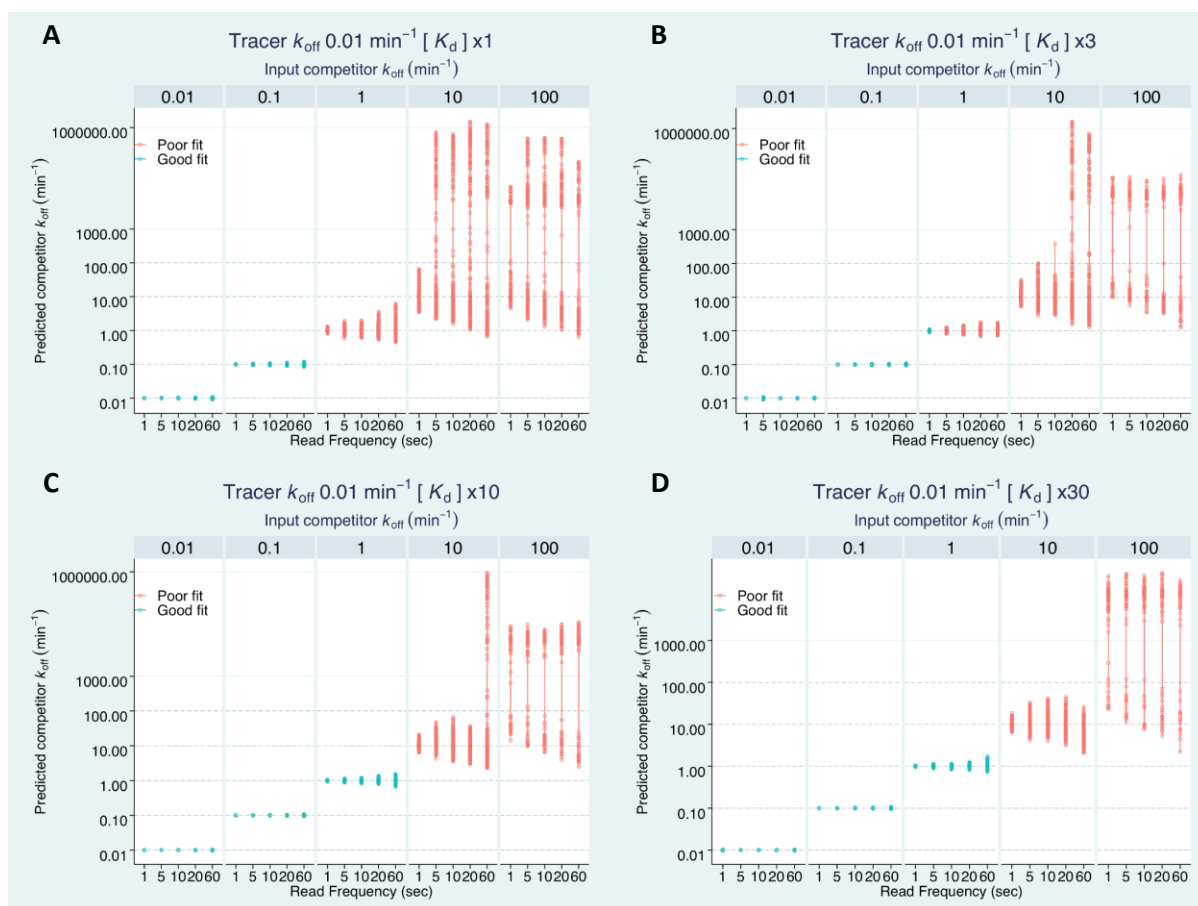

**Supplemental Figure 7.** Monte-Carlo simulation results exploring the effect of tracer kinetics and assay start and read frequency time on the accurate determination of competitor kinetic parameters representative of offline addition protocol. Effect of assay read frequency on measured  $k_{off}$  of unlabelled competitor compounds with varied kinetics in competition with different concentrations of a slowly dissociating tracer with kinetic parameters;  $k_{off}$  of 0.01 min<sup>-1</sup>,  $k_{on}$  of  $1 \times 10^9$  min<sup>-1</sup>. Tracer concentrations were **(A)**  $1 \times K_d$ , **(B)**  $3 \times K_d$ , **(C)**  $10 \times K_d$  and **(D)**  $30 \times K_d$ . Blue open symbols represent conditions which returned >90% reliable fits. Red open symbols represent conditions which returned <90% reliable fits. In all cases tracer simulations were performed with an initial start time of 30sec representative of addition of receptor to a reaction containing free tracer (L) and competitor (I), all of 200 values (minus outliers) for each simulated condition are plotted.



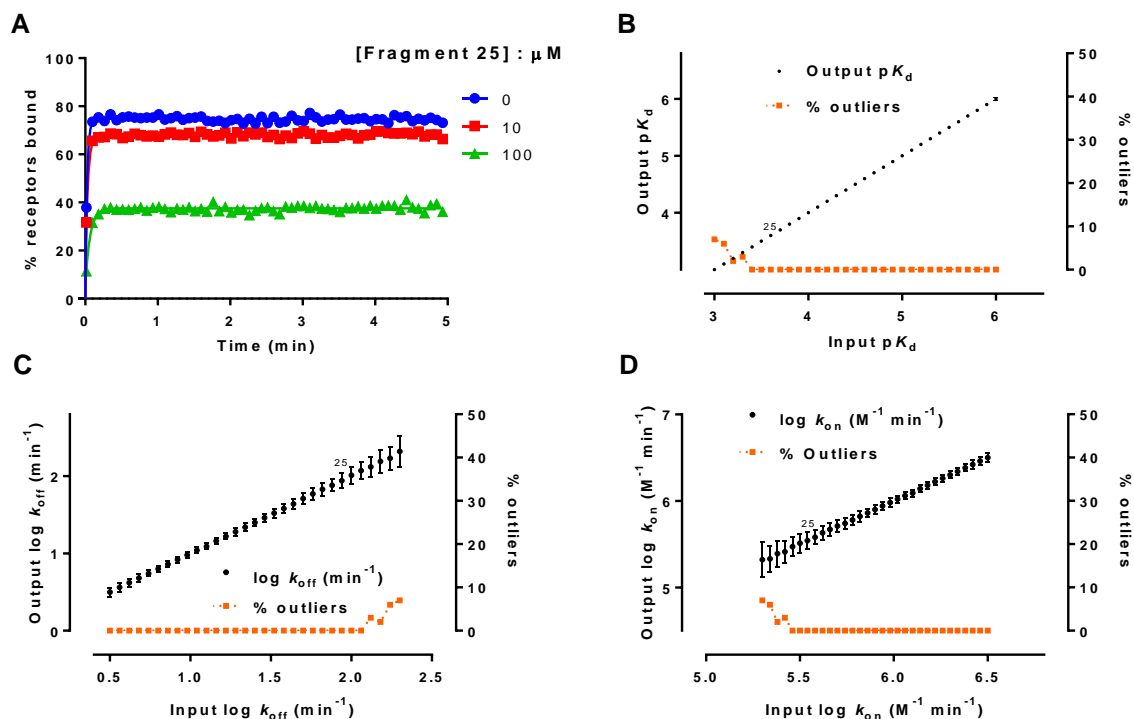

**Supplemental Figure 8.** Monte-Carlo simulation results representative of the competition profile observed between low affinity fragments 1 to 31 (affinities ranging from 1-1000  $\mu\text{M}$ ) tested at 10 and 100  $\mu\text{M}$  in competition with a fixed concentration of a rapidly dissociating tracer. **(A)** Competition between a fixed concentration ( $3x K_d$ ) of a rapidly dissociating tracer with the following kinetic parameters;  $k_{off}$  of  $10\text{min}^{-1}$ ,  $k_{on}$  of  $3 \times 10^7 \text{M}^{-1} \text{min}^{-1}$ , and competitor fragment 25 with the following kinetic parameters;  $k_{off}$  of  $87.1 \text{min}^{-1}$ ,  $k_{on}$  of  $5 \times 10^5 \text{M}^{-1} \text{min}^{-1}$ , data shown are representative of 200 simulations. **(B)** Correlation between input  $K_d$  and output  $K_d$ , **(C)** between input  $k_{off}$  and output  $k_{off}$ , **(D)** between input  $k_{on}$  and output  $k_{on}$ . In each case tracer and competitor binding simulations were performed with an initial start time of 1sec (representative of injection of receptor to a reaction containing tracer) and a read frequency of 5sec, the data shown points shown in the correlations plots are the average of 200 simulations.

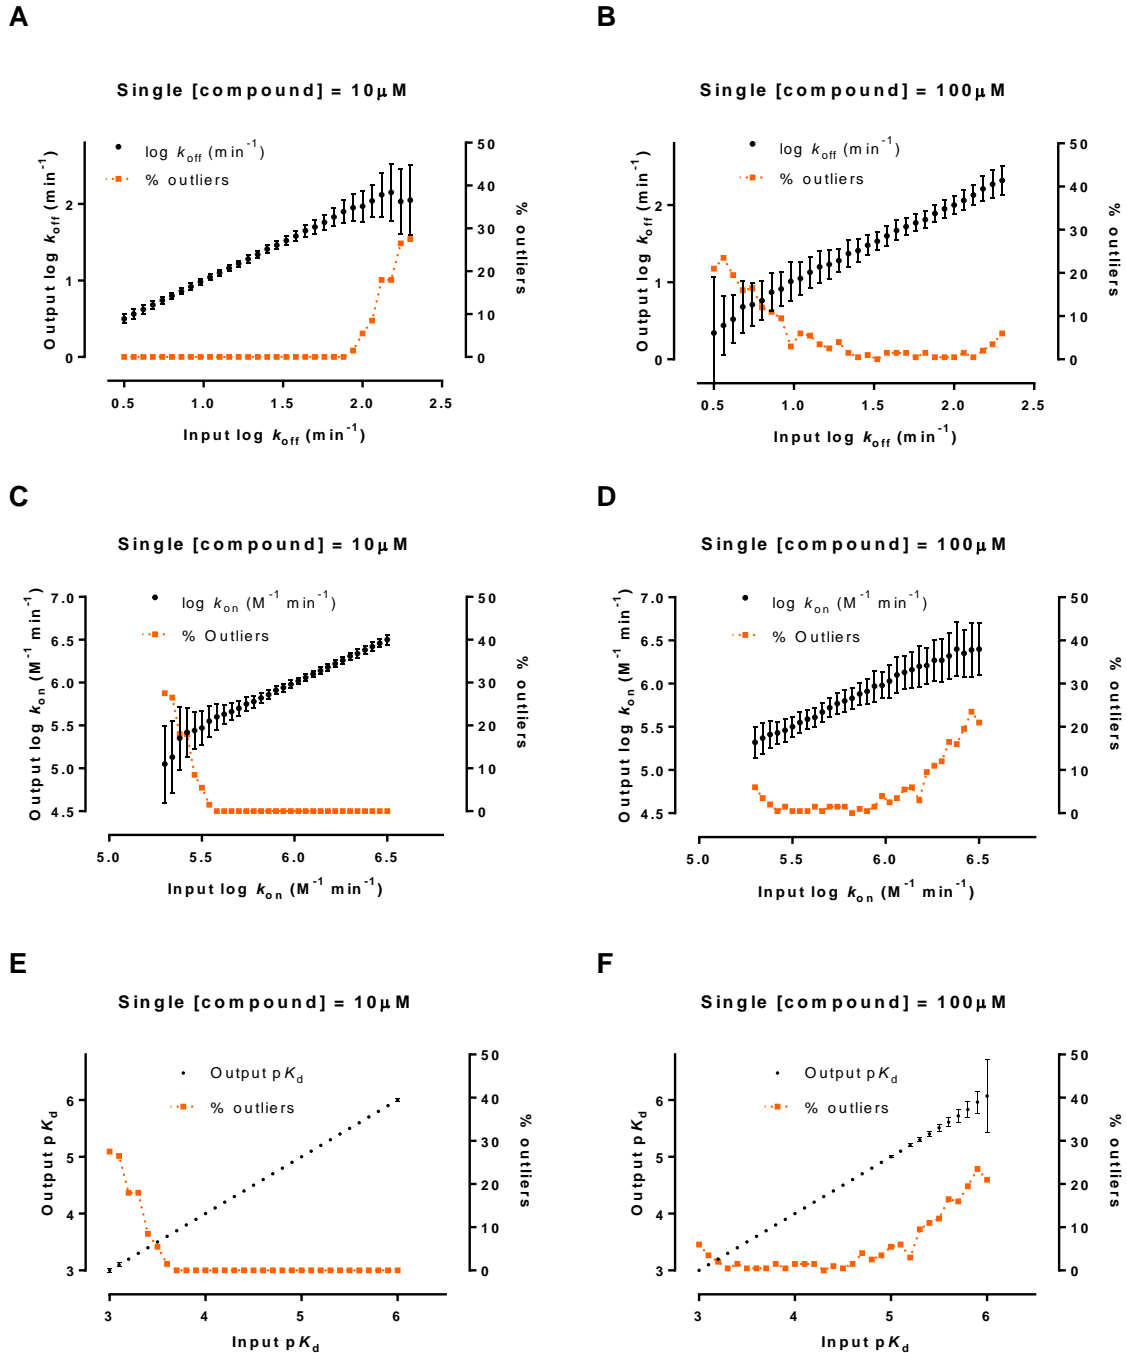

**Supplemental Figure 9.** Monte-Carlo simulation results representative of the competition profile observed between low affinity fragments (1-1000 $\mu$ M) tested at 10 and 100 $\mu$ M in competition with a fixed concentration (3x  $K_d$ ) of a rapidly dissociating tracer with the following kinetic parameters;  $k_{off}$  of 10 $\text{min}^{-1}$ ,  $k_{on}$  of  $3 \times 10^7 \text{M}^{-1} \text{min}^{-1}$ . Correlation between **A**) input  $k_{off}$  and output  $k_{off}$  at 10 $\mu$ M **B**) input  $k_{off}$  and output  $k_{off}$  at 100 $\mu$ M. **C**) input  $k_{on}$  and output  $k_{off}$  at 10 $\mu$ M. **D**) input  $k_{on}$  and output  $k_{off}$  at 100 $\mu$ M. **E**) input  $K_d$  and output  $K_d$ , at 10 $\mu$ M. **F**) input  $K_d$  and output  $K_d$ , at 100 $\mu$ M. In each case tracer and competitor binding

simulations were performed with an initial start time of 1sec (representative of injection of receptor to a reaction containing tracer) and a read frequency of 5sec, the data shown points shown in the correlations plots are the average of 200 simulations.

## Supplemental data files

**Supplemental Table 1.** Summary of the kinetic input parameters and their estimates for the tracer described in [Table 1](#), under conditions which mimic online and offline addition, determined from 200 simulated data sets using the global association model equation (see [Figure 1](#)).

| Online injection first read time 1sec     |                         |                                   |           |                                                          |              |                                                      |               |
|-------------------------------------------|-------------------------|-----------------------------------|-----------|----------------------------------------------------------|--------------|------------------------------------------------------|---------------|
| Number of :<br>(Ambiguous fits; Outliers) | Read frequency<br>(sec) | Input $K_d$ (Output $K_d$ )<br>nM | $K_d$ %CV | Input $k_{on}$<br>(Output $k_{on}$ )<br>$M^{-1}min^{-1}$ | $k_{on}$ %CV | Input $k_{off}$<br>(Output $k_{off}$ )<br>$min^{-1}$ | $k_{off}$ %CV |
| (0; 0)                                    | 1                       | 333 (333)                         | 0.21      | 3E7 (3E7)                                                | 1.29         | 10 (10.01)                                           | 1.32          |
| (0; 0)                                    | 5                       | 333 (333)                         | 0.47      | 3E7 (3E7)                                                | 2.31         | 10 (10.01)                                           | 2.27          |
| (0; 0)                                    | 10                      | 333 (333)                         | 0.72      | 3E7 (3E7)                                                | 2.49         | 10 (10.01)                                           | 2.50          |
| (0; 0)                                    | 20                      | 333 (334)                         | 0.96      | 3E7 (3.01E7)                                             | 2.34         | 10 (10.05)                                           | 2.40          |
| (0; 0)                                    | 60                      | 333 (333)                         | 1.67      | 3E7 (3E7)                                                | 2.72         | 10 (9.99)                                            | 3.07          |
| (0; 0)                                    | 1                       | 100 (100)                         | 0.26      | 1E7 (1E7)                                                | 0.44         | 1 (1.00)                                             | 0.53          |
| (0; 0)                                    | 5                       | 100 (100)                         | 0.55      | 1E7 (1E7)                                                | 0.93         | 1 (1.00)                                             | 1.18          |
| (0; 0)                                    | 10                      | 100 (100)                         | 0.81      | 1E7 (1E7)                                                | 1.34         | 1 (1.00)                                             | 1.71          |
| (0; 0)                                    | 20                      | 100 (100)                         | 1.10      | 1E7 (1E7)                                                | 1.62         | 1 (1.00)                                             | 2.10          |
| (0; 0)                                    | 60                      | 100 (100)                         | 2.14      | 1E7 (1E7)                                                | 2.74         | 1 (1.00)                                             | 3.52          |
| (0; 0)                                    | 1                       | 1 (1)                             | 0.14      | 1E8 (1E8)                                                | 0.14         | 0.1 (0.1)                                            | 0.22          |

|        |    |             |      |           |      |             |      |
|--------|----|-------------|------|-----------|------|-------------|------|
| (0; 0) | 5  | 1 (1)       | 0.32 | 1E8 (1E8) | 0.32 | 0.1 (0.1)   | 0.51 |
| (0; 0) | 10 | 1 (1)       | 0.49 | 1E8 (1E8) | 0.40 | 0.1 (0.1)   | 0.70 |
| (0; 0) | 20 | 1 (1)       | 0.61 | 1E8 (1E8) | 0.64 | 0.1 (0.1)   | 1.02 |
| (0; 0) | 60 | 1 (1)       | 1.03 | 1E8 (1E8) | 1.14 | 0.1 (0.1)   | 1.75 |
|        |    |             |      |           |      |             |      |
| (0; 0) | 1  | 0.01 (0.01) | 0.29 | 1E9 (1E9) | 0.06 | 0.01 (0.01) | 0.32 |
| (0; 0) | 5  | 0.01 (0.01) | 0.68 | 1E9 (1E9) | 0.15 | 0.01 (0.01) | 0.76 |
| (0; 0) | 10 | 0.01 (0.01) | 0.91 | 1E9 (1E9) | 0.20 | 0.01 (0.01) | 1.02 |
| (0; 0) | 20 | 0.01 (0.01) | 1.51 | 1E9 (1E9) | 0.29 | 0.01 (0.01) | 1.38 |
| (0; 0) | 60 | 0.01 (0.01) | 2.50 | 1E9 (1E9) | 0.55 | 0.01 (0.01) | 2.19 |

| Offline addition first read time 30 sec   |                         |                                   |           |                                                          |              |                                                      |               |
|-------------------------------------------|-------------------------|-----------------------------------|-----------|----------------------------------------------------------|--------------|------------------------------------------------------|---------------|
| Number of :<br>(Ambiguous fits; Outliers) | Read frequency<br>(sec) | Input $K_d$ (Output $K_d$ )<br>nM | $K_d$ %CV | Input $k_{on}$<br>(Output $k_{on}$ )<br>$M^{-1}min^{-1}$ | $k_{on}$ %CV | Input $k_{off}$<br>(Output $k_{off}$ )<br>$min^{-1}$ | $k_{off}$ %CV |
| (197; 0)                                  | 1                       | 333 (333)                         | 0.21      | 3E7 (1.12E7)                                             | 41.38        | 10 (37.17)                                           | 41.36         |
| (199; 8)                                  | 5                       | 333 (333)                         | 0.44      | 3E7 (1.71E8)                                             | 4.92         | 10 (56.90)                                           | 4.86          |
| (200; 2)                                  | 10                      | 333 (333)                         | 0.72      | 3E7 (2.30E8)                                             | 9.54         | 10 (76.78)                                           | 9.54          |
| (192; 0)                                  | 20                      | 333 (333)                         | 0.95      | 3E7 (1.67E8)                                             | 31.98        | 10 (55.54)                                           | 32.02         |
| (139; 2)                                  | 60                      | 333 (333)                         | 1.68      | 3E7 (1.13E8)                                             | 92.76        | 10 (37.69)                                           | 92.28         |

|        |    |              |      |              |      |             |      |
|--------|----|--------------|------|--------------|------|-------------|------|
| (0; 0) | 1  | 100 (100)    | 0.27 | 1E7 (9.66E6) | 0.67 | 1 (1.00)    | 0.80 |
| (0; 0) | 5  | 100 (100)    | 0.55 | 1E7 (1E7)    | 1.47 | 1 (1.00)    | 1.74 |
| (0; 0) | 10 | 100 (100)    | 0.83 | 1E7 (1E7)    | 2.08 | 1 (1.00)    | 2.50 |
| (0; 0) | 20 | 100 (100)    | 1.16 | 1E7 (1E7)    | 2.65 | 1 (1.00)    | 3.09 |
| (0; 0) | 60 | 100 (100)    | 1.94 | 1E7 (1E7)    | 3.39 | 1 (1.00)    | 4.27 |
| (0; 0) | 1  | 1 (1)        | 0.14 | 1E8 (1E8)    | 0.13 | 0.1 (0.1)   | 0.22 |
| (0; 0) | 5  | 1 (1)        | 0.33 | 1E8 (1E8)    | 0.33 | 0.1 (0.1)   | 0.52 |
| (0; 0) | 10 | 1 (1)        | 0.44 | 1E8 (1E8)    | 0.47 | 0.1 (0.1)   | 0.72 |
| (0; 0) | 20 | 1 (1)        | 0.63 | 1E8 (1E8)    | 0.63 | 0.1 (0.1)   | 0.97 |
| (0; 0) | 60 | 1 (1)        | 1.03 | 1E8 (1E8)    | 1.17 | 0.1 (0.1)   | 1.77 |
| (0; 0) | 1  | 0.01 (0.01)  | 0.30 | 1E9 (1E9)    | 0.06 | 0.01 (0.01) | 0.33 |
| (0; 0) | 5  | 0.01 (0.01)  | 0.68 | 1E9 (1E9)    | 0.15 | 0.01 (0.01) | 0.77 |
| (0; 0) | 10 | 0.01 (0.099) | 0.94 | 1E9 (1E9)    | 0.20 | 0.01 (0.01) | 1.05 |
| (0; 0) | 20 | 0.01 (0.01)  | 1.25 | 1E9 (1E9)    | 0.31 | 0.01 (0.01) | 1.41 |
| (0; 0) | 60 | 0.01 (0.01)  | 2.30 | 1E9 (9.99E8) | 0.53 | 0.01 (0.01) | 2.61 |

**Supplemental Table 2.** Summary of the kinetic input parameters and their estimates for unlabelled compounds under conditions which mimic online injection and offline addition of membranes, values are determined from 200 simulated data sets using the Motulsky-Mahan model equation and the very low affinity tracer ( $k_{on} = 3 \times 10^7 \text{ M}^{-1} \text{ min}^{-1}$ ;  $k_{off} = 10 \text{ min}^{-1}$   $K_d = 3 \mu\text{M}$ ).

| Online injection first read time 1sec     |                         |                                |           |                                                                         |              |                                                             |               |
|-------------------------------------------|-------------------------|--------------------------------|-----------|-------------------------------------------------------------------------|--------------|-------------------------------------------------------------|---------------|
| Number of :<br>(Ambiguous fits; Outliers) | Read frequency<br>(sec) | Input $K_d$<br>(Output $K_d$ ) | $K_d$ %CV | Input $k_{on}$<br>(Output $k_{on}$ )<br>$\text{M}^{-1} \text{min}^{-1}$ | $k_{on}$ %CV | Input $k_{off}$<br>(Output $k_{off}$ )<br>$\text{min}^{-1}$ | $k_{off}$ %CV |
| (0; 0)                                    | 1                       | 10pM (10pM)                    | 1.62      | 1E9 (1E9)                                                               | 0.18         | 0.01 (0.01)                                                 | 1.77          |
| (0; 0)                                    | 5                       | 10pM (10pM)                    | 3.44      | 1E9 (1E9)                                                               | 0.41         | 0.01 (0.01)                                                 | 3.78          |
| (0; 0)                                    | 10                      | 10pM (10pM)                    | 5.29      | 1E9 (1E9)                                                               | 0.57         | 0.01 (0.01)                                                 | 5.74          |
| (0; 0)                                    | 20                      | 10pM (10pM)                    | 6.82      | 1E9 (1E9)                                                               | 0.78         | 0.01 (0.01)                                                 | 7.42          |
| (0; 0)                                    | 60                      | 10pM (10pM)                    | 12.75     | 1E9 (0.999E8)                                                           | 1.32         | 0.01 (0.01)                                                 | 13.70         |
| (0; 0)                                    | 1                       | 1nM (1nM)                      | 1.12      | 1E8 (1E8)                                                               | 0.34         | 0.1 (0.1)                                                   | 1.38          |
| (0; 0)                                    | 5                       | 1nM (0.99nM)                   | 2.73      | 1E8 (1E8)                                                               | 0.78         | 0.1 (0.1)                                                   | 3.29          |
| (0; 0)                                    | 10                      | 1nM (1nM)                      | 3.98      | 1E8 (1E8)                                                               | 1.29         | 0.1 (0.1)                                                   | 4.99          |
| (0; 0)                                    | 20                      | 1nM (0.996nM)                  | 5.37      | 1E8 (1E8)                                                               | 1.51         | 0.1 (0.1)                                                   | 6.49          |
| (0; 0)                                    | 60                      | 1nM (0.991nM)                  | 12.13     | 1E8 (1E8)                                                               | 3.31         | 0.1 (0.1)                                                   | 14.79         |
| (0; 0)                                    | 1                       | 100nM (100nM)                  | 0.30      | 1E7 (9.99E6)                                                            | 0.68         | 1 (1)                                                       | 0.77          |
| (0; 0)                                    | 5                       | 100nM (99.9nM)                 | 0.62      | 1E7 (1E7)                                                               | 1.47         | 1 (1)                                                       | 1.64          |

|        |    |                |      |              |       |              |       |
|--------|----|----------------|------|--------------|-------|--------------|-------|
| (0; 0) | 10 | 100nM (100nM)  | 0.90 | 1E7 (1E7)    | 2.06  | 1 (1)        | 2.38  |
| (0; 0) | 20 | 100nM (99.9nM) | 1.42 | 1E7 (1E7)    | 2.94  | 1 (1)        | 3.42  |
| (0; 0) | 60 | 100nM (99.8nM) | 2.47 | 1E7 (1.01E7) | 6.86  | 1 (1.01)     | 7.42  |
|        |    |                |      |              |       |              |       |
| (0; 0) | 1  | 10μM (10μM)    | 0.25 | 1E6 (1E6)    | 2.06  | 10 (10)      | 2.08  |
| (0; 0) | 5  | 10μM (10μM)    | 0.62 | 1E6 (1E6)    | 5.68  | 10 (10.02)   | 5.74  |
| (0; 0) | 10 | 10μM (10μM)    | 0.92 | 1E6 (1.01E6) | 7.27  | 10 (10.05)   | 7.33  |
| (0; 0) | 20 | 10μM (9.99μM)  | 1.30 | 1E6 (1.01E6) | 6.94  | 10 (10.05)   | 7.03  |
| (0; 0) | 60 | 10μM (9.98μM)  | 2.54 | 1E6 (1.01E6) | 7.93  | 10 (10.06)   | 7.73  |
|        |    |                |      |              |       |              |       |
| (0; 0) | 1  | 1mM (1mM)      | 0.26 | 1E5 (9.98E4) | 14.41 | 100 (99.81)  | 14.42 |
| (0; 0) | 5  | 1mM (1mM)      | 0.58 | 1E5 (1.04E5) | 20.54 | 100 (103.86) | 20.57 |
| (0; 0) | 10 | 1mM (1mM)      | 0.86 | 1E5 (1.03E5) | 18.60 | 100 (103.48) | 18.71 |
| (0; 0) | 20 | 1mM (1mM)      | 1.14 | 1E5 (1.02E5) | 16.86 | 100 (101.83) | 17.11 |
| (0; 1) | 60 | 1mM (1mM)      | 2.36 | 1E5 (1.02E5) | 17.26 | 100 (102.38) | 17.57 |

| Offline addition first read time 30 sec   |                         |                                |           |                                                          |              |                                                      |               |
|-------------------------------------------|-------------------------|--------------------------------|-----------|----------------------------------------------------------|--------------|------------------------------------------------------|---------------|
| Number of :<br>(Ambiguous fits; Outliers) | Read frequency<br>(sec) | Input $K_d$<br>(Output $K_d$ ) | $K_d$ %CV | Input $k_{on}$<br>(Output $k_{on}$ )<br>$M^{-1}min^{-1}$ | $k_{on}$ %CV | Input $k_{off}$<br>(Output $k_{off}$ )<br>$min^{-1}$ | $k_{off}$ %CV |



|           |    |               |       |               |        |             |        |
|-----------|----|---------------|-------|---------------|--------|-------------|--------|
| (0; 0)    | 1  | 10pM (10pM)   | 1.55  | 1E9 (1E9)     | 0.17   | 0.01 (0.01) | 1.67   |
| (0; 0)    | 5  | 10pM (9.98pM) | 3.74  | 1E9 (1E9)     | 0.43   | 0.01 (0.01) | 4.09   |
| (0; 0)    | 10 | 10pM (10pM)   | 4.95  | 1E9 (1E9)     | 0.56   | 0.01 (0.01) | 5.43   |
| (0; 0)    | 20 | 10pM (10pM)   | 6.79  | 1E9 (1E9)     | 0.86   | 0.01 (0.01) | 7.47   |
| (0; 0)    | 60 | 10pM (9.94pM) | 12.31 | 1E9 (1E9)     | 1.42   | 0.01 (0.01) | 13.39  |
|           |    |               |       |               |        |             |        |
| (0; 0)    | 1  | 1nM (0.999nM) | 1.24  | 1E8 (1E8)     | 0.37   | 0.1 (0.1)   | 1.52   |
| (0; 0)    | 5  | 1nM (1nM)     | 2.68  | 1E8 (1E8)     | 0.90   | 0.1 (0.1)   | 3.39   |
| (0; 0)    | 10 | 1nM (1nM)     | 3.79  | 1E8 (1E8)     | 1.24   | 0.1 (0.1)   | 4.77   |
| (0; 0)    | 20 | 1nM (1nM)     | 5.42  | 1E8 (1E8)     | 1.70   | 0.1 (0.1)   | 6.73   |
| (0; 0)    | 60 | 1nM (0.998nM) | 9.62  | 1E8 (1E8)     | 2.78   | 0.1 (0.1)   | 11.83  |
|           |    |               |       |               |        |             |        |
| (0; 0)    | 1  | 100nM (100nM) | 0.33  | 1E7 (1E7)     | 1.04   | 1 (1)       | 1.18   |
| (0; 0)    | 5  | 100nM (100nM) | 0.70  | 1E7 (1E7)     | 2.18   | 1 (1)       | 2.38   |
| (0; 0)    | 10 | 100nM (100nM) | 0.92  | 1E7 (1E7)     | 3.05   | 1 (1)       | 3.30   |
| (0; 0)    | 20 | 100nM (100nM) | 1.41  | 1E7 (9.99E6)  | 4.28   | 1 (1)       | 4.79   |
| (0; 0)    | 60 | 100nM (100nM) | 1.30  | 1E7 (1E7)     | 3.85   | 1 (1)       | 4.26   |
|           |    |               |       |               |        |             |        |
| (193; 6)  | 1  | 10μM (10μM)   | 0.28  | 1E6 (2.42E11) | 277.73 | 10 (2.42E6) | 277.65 |
| (192; 19) | 5  | 10μM (10μM)   | 0.58  | 1E6 (2.43E11) | 261.24 | 10 (2.44E6) | 261.33 |

|           |    |                           |      |               |        |                |        |
|-----------|----|---------------------------|------|---------------|--------|----------------|--------|
| (187; 27) | 10 | 10 $\mu$ M (10 $\mu$ M)   | 0.93 | 1E6 (3.21E11) | 241.99 | 10 (3.20E6)    | 241.45 |
| (174; 30) | 20 | 10 $\mu$ M (9.98 $\mu$ M) | 1.18 | 1E6 (5.96E11) | 258.44 | 10 (5.96E6)    | 258.67 |
| (177; 31) | 60 | 10 $\mu$ M (10 $\mu$ M)   | 2.19 | 1E6 (2.70E12) | 275.64 | 10 (2.70E7)    | 275.21 |
|           |    |                           |      |               |        |                |        |
| (197; 0)  | 1  | 1mM (1mM)                 | 0.26 | 1E5 (7.89E7)  | 143.79 | 100 (78893.74) | 143.79 |
| (191; 5)  | 5  | 1mM (1mM)                 | 0.62 | 1E5 (3.01E8)  | 209.63 | 100 (3.01E5)   | 209.59 |
| (188; 9)  | 10 | 1mM (1mM)                 | 0.87 | 1E5 (2.50E8)  | 205.46 | 100 (2.51E5)   | 205.66 |
| (192; 22) | 20 | 1mM (9.99E-4)             | 1.14 | 1E5 (3.84E8)  | 209.43 | 100 (3.84E5)   | 209.53 |
| (191; 36) | 60 | 1mM (1mM)                 | 1.51 | 1E5 (3.29E8)  | 170.69 | 100 (3.30E5)   | 171.09 |

**Supplemental Table 3.** Summary of the kinetic input parameters and their estimates for unlabelled compounds under conditions which mimic online injection and offline addition of membranes, values are determined from 200 simulated data sets using the Motulsky-Mahan model equation and the low affinity tracer ( $k_{on} = 1 \times 10^7 \text{M}^{-1} \text{min}^{-1}$ ;  $k_{off} = 1 \text{min}^{-1}$   $K_d = 0.1 \mu\text{M}$ ).

| Online injection first read time 1sec     |                         |                                |           |                                                                         |              |                                                             |               |
|-------------------------------------------|-------------------------|--------------------------------|-----------|-------------------------------------------------------------------------|--------------|-------------------------------------------------------------|---------------|
| Number of :<br>(Ambiguous fits; Outliers) | Read frequency<br>(sec) | Input $K_d$<br>(Output $K_d$ ) | $K_d$ %CV | Input $k_{on}$<br>(Output $k_{on}$ )<br>$\text{M}^{-1} \text{min}^{-1}$ | $k_{on}$ %CV | Input $k_{off}$<br>(Output $k_{off}$ )<br>$\text{min}^{-1}$ | $k_{off}$ %CV |
| (0; 0)                                    | 1                       | 10pM (10.03pM)                 | 1.72      | 1E9 (1E9)                                                               | 0.21         | 0.01 (0.01)                                                 | 1.90          |
| (0; 0)                                    | 5                       | 10pM (10.01pM)                 | 3.49      | 1E9 (1E9)                                                               | 0.38         | 0.01 (0.01)                                                 | 3.78          |
| (0; 0)                                    | 10                      | 10pM (10.03pM)                 | 5.17      | 1E9 (1E9)                                                               | 0.61         | 0.01 (0.01)                                                 | 5.68          |
| (0; 0)                                    | 20                      | 10pM (9.96pM)                  | 8.02      | 1E9 (1E9)                                                               | 0.90         | 0.01 (0.01)                                                 | 8.75          |
| (0; 0)                                    | 60                      | 10pM (9.97pM)                  | 12.56     | 1E9 (0.999E8)                                                           | 1.49         | 0.01 (0.01)                                                 | 13.80         |
| (0; 0)                                    | 1                       | 1nM (1nM)                      | 0.48      | 1E8 (1E8)                                                               | 0.32         | 0.1 (0.1)                                                   | 0.74          |
| (0; 0)                                    | 5                       | 1nM (0.9993nM)                 | 1.05      | 1E8 (1E8)                                                               | 0.66         | 0.1 (0.1)                                                   | 1.53          |
| (0; 0)                                    | 10                      | 1nM (1nM)                      | 1.54      | 1E8 (1E8)                                                               | 0.98         | 0.1 (0.1)                                                   | 2.32          |
| (0; 0)                                    | 20                      | 1nM (0.996nM)                  | 2.25      | 1E8 (9.99E7)                                                            | 1.35         | 0.1 (0.1)                                                   | 3.22          |
| (0; 0)                                    | 60                      | 1nM (1.002nM)                  | 4.06      | 1E8 (1E8)                                                               | 2.67         | 0.1 (0.1)                                                   | 6.12          |
| (0; 0)                                    | 1                       | 100nM (100nM)                  | 0.20      | 1E7 (1E7)                                                               | 0.81         | 1 (1)                                                       | 0.88          |
| (0; 0)                                    | 5                       | 100nM (100nM)                  | 0.47      | 1E7 (9.99E6)                                                            | 1.41         | 1 (1)                                                       | 1.53          |

|                  |    |               |      |              |       |              |       |
|------------------|----|---------------|------|--------------|-------|--------------|-------|
| (0; 0)           | 10 | 100nM (100nM) | 0.62 | 1E7 (1E7)    | 2.20  | 1 (1)        | 2.29  |
| (0; 0)           | 20 | 100nM (100nM) | 0.90 | 1E7 (1E7)    | 3.24  | 1 (1)        | 3.48  |
| (0; 0)           | 60 | 100nM (100nM) | 1.67 | 1E7 (1E7)    | 7.85  | 1 (1)        | 8.46  |
| <b>Separator</b> |    |               |      |              |       |              |       |
| (0; 0)           | 1  | 10μM (10μM)   | 0.18 | 1E6 (1.01E6) | 4.04  | 10 (10.07)   | 4.07  |
| (0; 0)           | 5  | 10μM (10μM)   | 0.43 | 1E6 (1.01E6) | 9.08  | 10 (10.06)   | 9.13  |
| (0; 0)           | 10 | 10μM (10μM)   | 0.64 | 1E6 (1.01E6) | 13.24 | 10 (10.14)   | 13.32 |
| (0; 0)           | 20 | 10μM (10μM)   | 0.85 | 1E6 (1.06E6) | 27.32 | 10 (10.57)   | 27.51 |
| (0; 4)           | 60 | 10μM (10μM)   | 1.52 | 1E6 (1.03E6) | 48.92 | 10 (10.29)   | 49.03 |
| <b>Separator</b> |    |               |      |              |       |              |       |
| (200; 4)         | 1  | 1mM (1mM)     | 0.19 | 1E5 (1.07E5) | 35.44 | 100 (107.40) | 35.47 |
| (194; 23)        | 5  | 1mM (1mM)     | 0.47 | 1E5 (1.45E5) | 96.89 | 100 (145.64) | 97.11 |
| (188; 30)        | 10 | 1mM (1mM)     | 0.56 | 1E5 (1.25E5) | 82.92 | 100 (124.57) | 82.98 |
| (161; 34)        | 20 | 1mM (1mM)     | 0.89 | 1E5 (1.10E5) | 84.50 | 100 (109.54) | 84.29 |
| (110; 54)        | 60 | 1mM (1mM)     | 1.51 | 1E5 (1.08E5) | 79.17 | 100 (108.44) | 79.07 |

| Offline addition first read time 30 sec   |                         |                                |           |                                                          |              |                                                      |               |
|-------------------------------------------|-------------------------|--------------------------------|-----------|----------------------------------------------------------|--------------|------------------------------------------------------|---------------|
| Number of :<br>(Ambiguous fits; Outliers) | Read frequency<br>(sec) | Input $K_d$<br>(Output $K_d$ ) | $K_d$ %CV | Input $k_{on}$<br>(Output $k_{on}$ )<br>$M^{-1}min^{-1}$ | $k_{on}$ %CV | Input $k_{off}$<br>(Output $k_{off}$ )<br>$min^{-1}$ | $k_{off}$ %CV |

|         |    |                 |       |              |       |             |       |
|---------|----|-----------------|-------|--------------|-------|-------------|-------|
| (0; 0)  | 1  | 10pM (10.02pM)  | 1.59  | 1E9 (1E9)    | 0.19  | 0.01 (0.01) | 1.74  |
| (0; 0)  | 5  | 10pM (10.02pM)  | 3.85  | 1E9 (1E9)    | 0.43  | 0.01 (0.01) | 4.20  |
| (0; 0)  | 10 | 10pM (10.02pM)  | 5.34  | 1E9 (1E9)    | 0.63  | 0.01 (0.01) | 5.85  |
| (0; 0)  | 20 | 10pM (10.05pM)  | 7.15  | 1E9 (1E9)    | 0.81  | 0.01 (0.01) | 7.77  |
| (0; 0)  | 60 | 10pM (9.73pM)   | 13.56 | 1E9 (9.97E8) | 1.53  | 0.01 (0.01) | 14.84 |
|         |    |                 |       |              |       |             |       |
| (0; 0)  | 1  | 1nM (1nM)       | 0.53  | 1E8 (1E8)    | 0.33  | 0.1 (0.1)   | 0.77  |
| (0; 0)  | 5  | 1nM (1nM)       | 1.10  | 1E8 (9.99E7) | 0.79  | 0.1 (0.1)   | 1.70  |
| (0; 0)  | 10 | 1nM (1nM)       | 1.52  | 1E8 (1E8)    | 1.01  | 0.1 (0.1)   | 2.30  |
| (0; 0)  | 20 | 1nM (1.002nM)   | 2.36  | 1E8 (1E8)    | 1.44  | 0.1 (0.1)   | 3.37  |
| (0; 0)  | 60 | 1nM (1.002nM)   | 3.59  | 1E8 (1E8)    | 2.45  | 0.1 (0.1)   | 5.39  |
|         |    |                 |       |              |       |             |       |
| (0; 0)  | 1  | 100nM (100nM)   | 0.22  | 1E7 (1E7)    | 0.87  | 1 (1)       | 0.96  |
| (0; 0)  | 5  | 100nM (100nM)   | 0.44  | 1E7 (1E7)    | 2.07  | 1 (1)       | 2.15  |
| (0; 0)  | 10 | 100nM (100nM)   | 0.67  | 1E7 (1E7)    | 2.67  | 1 (1)       | 2.85  |
| (0; 0)  | 20 | 100nM (99.99nM) | 0.91  | 1E7 (1E7)    | 3.92  | 1 (1)       | 4.14  |
| (0; 0)  | 60 | 100nM (100nM)   | 0.97  | 1E7 (1E7)    | 3.75  | 1 (1)       | 3.96  |
|         |    |                 |       |              |       |             |       |
| (10; 0) | 1  | 10μM (9.998μM)  | 0.21  | 1E6 (1.02E6) | 11.41 | 10 (10.22)  | 11.46 |
| (25; 0) | 5  | 10μM (9.998μM)  | 0.41  | 1E6 (1.06E6) | 35.34 | 10 (10.60)  | 35.44 |

|           |    |                            |      |              |        |              |        |
|-----------|----|----------------------------|------|--------------|--------|--------------|--------|
| (24; 9)   | 10 | 10 $\mu$ M (9.998 $\mu$ M) | 0.64 | 1E6 (1.01E6) | 36.20  | 10 (11.02)   | 36.30  |
| (33; 5)   | 20 | 10 $\mu$ M (10 $\mu$ M)    | 0.95 | 1E6 (1.21E6) | 53.14  | 10 (12.14)   | 53.50  |
| (15; 11)  | 60 | 10 $\mu$ M (10 $\mu$ M)    | 1.50 | 1E6 (1.13E6) | 48.06  | 10 (11.35)   | 48.33  |
|           |    |                            |      |              |        |              |        |
| (200; 23) | 1  | 1mM (0.994mM)              | 0.19 | 1E5 (6.05E7) | 312.35 | 100 (6.06E4) | 312.28 |
| (200; 12) | 5  | 1mM (1mM)                  | 0.44 | 1E5 (1.47E9) | 249.83 | 100 (1.47E6) | 249.81 |
| (192; 33) | 10 | 1mM (1mM)                  | 0.65 | 1E5 (2.15E8) | 273.44 | 100 (2.16E5) | 273.47 |
| (173; 13) | 20 | 1mM (9.99E-4)              | 0.91 | 1E5 (2.83E9) | 236.28 | 100 (2.83E6) | 235.84 |
| (138; 11) | 60 | 1mM (9.98E-4)              | 1.42 | 1E5 (4.33E9) | 252.26 | 100 (4.34E6) | 252.33 |

**Supplemental Table 4.** Summary of the kinetic input parameters and their estimates for unlabelled compounds under conditions which mimic online injection and offline addition of membranes, values are determined from 200 simulated data sets using the Motulsky-Mahan model equation and the low affinity tracer ( $k_{on} = 1 \times 10^8 \text{M}^{-1} \text{min}^{-1}$ ;  $k_{off} = 0.1 \text{min}^{-1}$   $K_d = 1 \text{nM}$ ).

| Online injection first read time 1sec     |                         |                                |           |                                                                        |              |                                                             |               |
|-------------------------------------------|-------------------------|--------------------------------|-----------|------------------------------------------------------------------------|--------------|-------------------------------------------------------------|---------------|
| Number of :<br>(Ambiguous fits; Outliers) | Read frequency<br>(sec) | Input $K_d$<br>(Output $K_d$ ) | $K_d$ %CV | Input $k_{on}$<br>(Output $k_{on}$ )<br>$\text{M}^{-1}\text{min}^{-1}$ | $k_{on}$ %CV | Input $k_{off}$<br>(Output $k_{off}$ )<br>$\text{min}^{-1}$ | $k_{off}$ %CV |
| (0; 0)                                    | 1                       | 10pM (10pM)                    | 1.07      | 1E9 (1E9)                                                              | 0.18         | 0.01 (0.01)                                                 | 1.22          |
| (0; 0)                                    | 5                       | 10pM (9.99pM)                  | 2.41      | 1E9 (1E9)                                                              | 0.42         | 0.01 (0.01)                                                 | 2.74          |
| (0; 0)                                    | 10                      | 10pM (10pM)                    | 3.52      | 1E9 (1E9)                                                              | 0.62         | 0.01 (0.01)                                                 | 4.06          |
| (0; 0)                                    | 20                      | 10pM (10pM)                    | 5.05      | 1E9 (1E9)                                                              | 0.88         | 0.01 (0.01)                                                 | 5.05          |
| (0; 0)                                    | 60                      | 10pM (10pM)                    | 8.33      | 1E9 (1E9)                                                              | 1.54         | 0.01 (0.01)                                                 | 9.55          |
| (0; 0)                                    | 1                       | 1nM (1nM)                      | 0.17      | 1E8 (1E8)                                                              | 0.29         | 0.1 (0.1)                                                   | 0.38          |
| (0; 0)                                    | 5                       | 1nM (0.9993nM)                 | 0.38      | 1E8 (1E8)                                                              | 0.57         | 0.1 (0.1)                                                   | 0.75          |
| (0; 0)                                    | 10                      | 1nM (1nM)                      | 0.56      | 1E8 (1E8)                                                              | 0.92         | 0.1 (0.1)                                                   | 1.24          |
| (0; 0)                                    | 20                      | 1nM (0.999nM)                  | 0.81      | 1E8 (9.98E7)                                                           | 1.27         | 0.1 (0.1)                                                   | 1.73          |
| (0; 0)                                    | 60                      | 1nM (0.999nM)                  | 1.34      | 1E8 (9.99E7)                                                           | 2.04         | 0.1 (0.1)                                                   | 2.78          |
| (0; 0)                                    | 1                       | 100nM (100nM)                  | 0.12      | 1E7 (1E7)                                                              | 1.23         | 1 (1)                                                       | 1.27          |
| (0; 0)                                    | 5                       | 100nM (100nM)                  | 0.25      | 1E7 (1.01E7)                                                           | 3.10         | 1 (1)                                                       | 3.20          |

|           |    |                |      |              |        |               |        |
|-----------|----|----------------|------|--------------|--------|---------------|--------|
| (0; 0)    | 10 | 100nM (100nM)  | 0.38 | 1.01E7 (1E7) | 4.0    | 1 (1.01)      | 4.15   |
| (0; 0)    | 20 | 100nM (100nM)  | 0.59 | 1E7 (9.99E6) | 6.0    | 1 (1)         | 6.17   |
| (0; 0)    | 60 | 100nM (99.9nM) | 0.99 | 1E7 (1.02E7) | 10.71  | 1 (1.02)      | 10.87  |
|           |    |                |      |              |        |               |        |
| (198; 0)  | 1  | 10μM (10μM)    | 0.12 | 1E6 (1.01E6) | 11.55  | 10 (10.07)    | 11.57  |
| (167; 1)  | 5  | 10μM (10μM)    | 0.27 | 1E6 (1.08E6) | 30.83  | 10 (10.84)    | 30.90  |
| (165; 6)  | 10 | 10μM (10μM)    | 0.35 | 1E6 (1.17E6) | 46.26  | 10 (11.74)    | 46.37  |
| (145; 12) | 20 | 10μM (10μM)    | 0.51 | 1E6 (1.14E6) | 52.10  | 10 (11.45)    | 52.30  |
| (138; 38) | 60 | 10μM (9.99μM)  | 0.98 | 1E6 (1.31E6) | 104.83 | 10 (13.12)    | 104.98 |
|           |    |                |      |              |        |               |        |
| (200; 29) | 1  | 1mM (1mM)      | 0.12 | 1E5 (3.79E6) | 283.24 | 100 (3789.78) | 283.25 |
| (200; 6)  | 5  | 1mM (1mM)      | 0.27 | 1E5 (1.72E8) | 251.19 | 100 (1.72E5)  | 251.26 |
| (200; 35) | 10 | 1mM (0.994mM)  | 7.82 | 1E5 (2.89E7) | 261.12 | 100 (2.56E4)  | 245.84 |
| (197; 24) | 20 | 1mM (1mM)      | 0.54 | 1E5 (2.52E8) | 277.58 | 100 (2.52E5)  | 277.30 |
| (175; 13) | 60 | 1mM (1mM)      | 0.86 | 1E5 (1.18E9) | 240.35 | 100 (1.18E6)  | 240.04 |

| Offline addition first read time 30 sec   |                         |                                |           |                                                          |              |                                                      |               |
|-------------------------------------------|-------------------------|--------------------------------|-----------|----------------------------------------------------------|--------------|------------------------------------------------------|---------------|
| Number of :<br>(Ambiguous fits; Outliers) | Read frequency<br>(sec) | Input $K_d$<br>(Output $K_d$ ) | $K_d$ %CV | Input $k_{on}$<br>(Output $k_{on}$ )<br>$M^{-1}min^{-1}$ | $k_{on}$ %CV | Input $k_{off}$<br>(Output $k_{off}$ )<br>$min^{-1}$ | $k_{off}$ %CV |



|          |    |                |      |              |       |             |       |
|----------|----|----------------|------|--------------|-------|-------------|-------|
| (0; 0)   | 1  | 10pM (10.02pM) | 1.21 | 1E9 (1E9)    | 0.20  | 0.01 (0.01) | 1.38  |
| (0; 0)   | 5  | 10pM (9.99pM)  | 2.37 | 1E9 (1E9)    | 0.43  | 0.01 (0.01) | 2.73  |
| (0; 0)   | 10 | 10pM (10.02pM) | 3.72 | 1E9 (1E9)    | 0.59  | 0.01 (0.01) | 4.21  |
| (0; 0)   | 20 | 10pM (10.1pM)  | 4.55 | 1E9 (1E9)    | 0.86  | 0.01 (0.01) | 5.23  |
| (0; 0)   | 60 | 10pM (10pM)    | 8.39 | 1E9 (9.97E8) | 1.51  | 0.01 (0.01) | 9.60  |
|          |    |                |      |              |       |             |       |
| (0; 0)   | 1  | 1nM (1nM)      | 0.17 | 1E8 (1E8)    | 0.27  | 0.1 (0.1)   | 0.38  |
| (0; 0)   | 5  | 1nM (1nM)      | 0.37 | 1E8 (1E8)    | 0.66  | 0.1 (0.1)   | 0.88  |
| (0; 0)   | 10 | 1nM (1nM)      | 0.50 | 1E8 (1E8)    | 0.88  | 0.1 (0.1)   | 1.14  |
| (0; 0)   | 20 | 1nM (1nM)      | 0.74 | 1E8 (1E8)    | 1.35  | 0.1 (0.1)   | 1.78  |
| (0; 0)   | 60 | 1nM (1nM)      | 1.27 | 1E8 (1E8)    | 2.34  | 0.1 (0.1)   | 3.13  |
|          |    |                |      |              |       |             |       |
| (0; 0)   | 1  | 100nM (100nM)  | 0.28 | 1E7 (1E7)    | 1.57  | 1 (1)       | 1.71  |
| (0; 0)   | 5  | 100nM (100nM)  | 0.44 | 1E7 (1E7)    | 2.07  | 1 (1)       | 2.15  |
| (0; 0)   | 10 | 100nM (100nM)  | 0.35 | 1E7 (9.96E6) | 3.76  | 1 (1)       | 3.80  |
| (0; 0)   | 20 | 100nM (100nM)  | 0.51 | 1E7 (1E7)    | 5.80  | 1 (1)       | 5.91  |
| (0; 0)   | 60 | 100nM (100nM)  | 0.55 | 1E7 (1E7)    | 5.52  | 1 (1)       | 5.64  |
|          |    |                |      |              |       |             |       |
| (200; 0) | 1  | 10μM (10μM)    | 0.11 | 1E6 (1.05E6) | 13.71 | 10 (10.47)  | 13.74 |
| (189; 5) | 5  | 10μM (10μM)    | 0.26 | 1E6 (1.10E6) | 30.09 | 10 (10.96)  | 30.17 |

|           |    |                           |      |              |        |              |        |
|-----------|----|---------------------------|------|--------------|--------|--------------|--------|
| (160; 3)  | 10 | 10 $\mu$ M (10 $\mu$ M)   | 0.35 | 1E6 (1.11E6) | 44.94  | 10 (11.10)   | 45.04  |
| (146; 9)  | 20 | 10 $\mu$ M (10 $\mu$ M)   | 0.51 | 1E6 (1.21E6) | 67.30  | 10 (12.15)   | 67.49  |
| (127; 32) | 60 | 10 $\mu$ M (9.98 $\mu$ M) | 0.96 | 1E6 (1.33E6) | 90.67  | 10 (13.30)   | 91.04  |
|           |    |                           |      |              |        |              |        |
| (200; 16) | 1  | 1mM (0.994mM)             | 7.39 | 1E5 (5.92E6) | 326.01 | 100 (5.30E3) | 328.85 |
| (200; 36) | 5  | 1mM (1mM)                 | 0.25 | 1E5 (1.51E7) | 248.87 | 100 (1.51E4) | 249.0  |
| (199; 8)  | 10 | 1mM (1mM)                 | 0.33 | 1E5 (3.17E8) | 283.26 | 100 (3.17E5) | 283.26 |
| (173; 23) | 20 | 1mM (9.99E-4)             | 0.96 | 1E5 (6.49E8) | 235.89 | 100 (2.83E6) | 235.57 |
| (180; 13) | 60 | 1mM (1mM)                 | 0.99 | 1E5 (5.02E8) | 217.62 | 100 (5.02E5) | 217.31 |

**Supplemental Table 5.** Summary of the kinetic input parameters and their estimates for unlabelled compounds under conditions which mimic online injection and offline addition of membranes, values are determined from 200 simulated data sets using the Motulsky-Mahan model equation and the low affinity tracer ( $k_{on} = 1 \times 10^9 \text{M}^{-1} \text{min}^{-1}$ ;  $k_{off} = 0.01 \text{min}^{-1}$   $K_d = 10 \text{pM}$ ).

| Online injection first read time 1sec     |                         |                                |           |                                                                         |              |                                                             |               |
|-------------------------------------------|-------------------------|--------------------------------|-----------|-------------------------------------------------------------------------|--------------|-------------------------------------------------------------|---------------|
| Number of :<br>(Ambiguous fits; Outliers) | Read frequency<br>(sec) | Input $K_d$<br>(Output $K_d$ ) | $K_d$ %CV | Input $k_{on}$<br>(Output $k_{on}$ )<br>$\text{M}^{-1} \text{min}^{-1}$ | $k_{on}$ %CV | Input $k_{off}$<br>(Output $k_{off}$ )<br>$\text{min}^{-1}$ | $k_{off}$ %CV |
| (0; 0)                                    | 1                       | 10pM (10pM)                    | 0.10      | 1E9 (1E9)                                                               | 0.11         | 0.01 (0.01)                                                 | 0.18          |
| (0; 0)                                    | 5                       | 10pM (10pM)                    | 0.22      | 1E9 (1E9)                                                               | 0.25         | 0.01 (0.01)                                                 | 0.41          |
| (0; 0)                                    | 10                      | 10pM (10pM)                    | 0.33      | 1E9 (1E9)                                                               | 0.34         | 0.01 (0.01)                                                 | 0.61          |
| (0; 0)                                    | 20                      | 10pM (10pM)                    | 0.45      | 1E9 (1E9)                                                               | 0.54         | 0.01 (0.01)                                                 | 0.89          |
| (0; 0)                                    | 60                      | 10pM (10pM)                    | 0.86      | 1E9 (9.99E8)                                                            | 0.84         | 0.01 (0.01)                                                 | 1.51          |
| (0; 0)                                    | 1                       | 1nM (1nM)                      | 0.05      | 1E8 (1E8)                                                               | 0.44         | 0.1 (0.1)                                                   | 0.46          |
| (0; 0)                                    | 5                       | 1nM (1nM)                      | 0.12      | 1E8 (1E8)                                                               | 0.88         | 0.1 (0.1)                                                   | 0.93          |
| (0; 0)                                    | 10                      | 1nM (1nM)                      | 0.17      | 1E8 (1E8)                                                               | 1.47         | 0.1 (0.1)                                                   | 1.51          |
| (0; 0)                                    | 20                      | 1nM (1nM)                      | 0.24      | 1E8 (1E8)                                                               | 1.92         | 0.1 (0.1)                                                   | 2.01          |
| (0; 0)                                    | 60                      | 1nM (1nM)                      | 0.47      | 1E8 (1E8)                                                               | 3.53         | 0.1 (0.1)                                                   | 3.75          |
| (7; 0)                                    | 1                       | 100nM (100nM)                  | 0.05      | 1E7 (9.97E6)                                                            | 3.58         | 1 (1)                                                       | 3.59          |
| (43; 0)                                   | 5                       | 100nM (100nM)                  | 0.11      | 1E7 (1.01E7)                                                            | 8.31         | 1 (1.01)                                                    | 8.36          |

|           |    |                |      |               |        |                |        |
|-----------|----|----------------|------|---------------|--------|----------------|--------|
| (50; 0)   | 10 | 100nM (100nM)  | 0.15 | 1E7 (1.01E7)  | 11.68  | 1 (1.01)       | 11.74  |
| (66; 0)   | 20 | 100nM (100nM)  | 0.22 | 1E7 (1.03E7)  | 15.59  | 1 (1.03)       | 15.65  |
| (80; 2)   | 60 | 100nM (99.9nM) | 0.37 | 1E7 (1.07E7)  | 35.12  | 1 (1.07)       | 35.29  |
| <b>1</b>  |    |                |      |               |        |                |        |
| (200; 1)  | 1  | 10μM (10μM)    | 0.05 | 1E6 (1.15E6)  | 43.79  | 10 (11.52)     | 43.81  |
| (200; 29) | 5  | 10μM (10μM)    | 0.12 | 1E6 (1.12E6)  | 66.90  | 10 (11.25)     | 66.95  |
| (200; 14) | 10 | 10μM (10μM)    | 0.16 | 1E6 (1.75E9)  | 294.79 | 10 (17548.04)  | 294.76 |
| (200; 8)  | 20 | 10μM (10μM)    | 0.24 | 1E6 (5.64E9)  | 250.94 | 10 (56466.86)  | 251.01 |
| (200; 6)  | 60 | 10μM (10μM)    | 0.39 | 1E6 (8.72E9)  | 230.45 | 10 (87216.14)  | 230.35 |
| <b>1</b>  |    |                |      |               |        |                |        |
| (200; 11) | 1  | 1mM (1mM)      | 0.05 | 1E5 (9.55E6)  | 48.48  | 100 (9553.29)  | 48.47  |
| (200; 21) | 5  | 1mM (1mM)      | 0.12 | 1E5 (9.79E6)  | 54.05  | 100 (9787.06)  | 54.05  |
| (200; 16) | 10 | 1mM (1mM)      | 0.15 | 1E5 (9.77E6)  | 59.74  | 100 (9770.79)  | 59.74  |
| (200; 22) | 20 | 1mM (1mM)      | 0.21 | 1E5 (1.17 E7) | 98.96  | 100 (11729.2)  | 99.01  |
| (200; 16) | 60 | 1mM (1mM)      | 0.36 | 1E5 (1.27E7)  | 92.39  | 100 (12507.79) | 92.30  |

| <b>Online injection first read time 1sec</b> |                         |                                |           |                                                          |              |                                                      |               |
|----------------------------------------------|-------------------------|--------------------------------|-----------|----------------------------------------------------------|--------------|------------------------------------------------------|---------------|
| Number of :<br>(Ambiguous fits; Outliers)    | Read frequency<br>(sec) | Input $K_d$<br>(Output $K_d$ ) | $K_d$ %CV | Input $k_{on}$<br>(Output $k_{on}$ )<br>$M^{-1}min^{-1}$ | $k_{on}$ %CV | Input $k_{off}$<br>(Output $k_{off}$ )<br>$min^{-1}$ | $k_{off}$ %CV |

|           |    |               |      |              |        |             |        |
|-----------|----|---------------|------|--------------|--------|-------------|--------|
| (0; 0)    | 1  | 10pM (10pM)   | 0.10 | 1E9 (1E9)    | 0.12   | 0.01 (0.01) | 0.20   |
| (0; 0)    | 5  | 10pM (9.99pM) | 2.43 | 1E9 (1E9)    | 0.46   | 0.01 (0.01) | 2.81   |
| (0; 0)    | 10 | 10pM (10pM)   | 0.33 | 1E9 (1E9)    | 0.37   | 0.01 (0.01) | 0.62   |
| (0; 0)    | 20 | 10pM (10pM)   | 0.43 | 1E9 (1E9)    | 0.53   | 0.01 (0.01) | 0.86   |
| (0; 0)    | 60 | 10pM (10pM)   | 0.78 | 1E9          | 0.87   | 0.01 (0.01) | 1.46   |
|           |    |               |      |              |        |             |        |
| (0; 0)    | 1  | 1nM (1nM)     | 0.05 | 1E8 (1E8)    | 0.46   | 0.1 (0.1)   | 0.48   |
| (0; 0)    | 5  | 1nM (1nM)     | 0.12 | 1E8 (9.99E7) | 0.89   | 0.1 (0.1)   | 0.93   |
| (0; 0)    | 10 | 1nM (1nM)     | 0.16 | 1E8 (1E8)    | 1.36   | 0.1 (0.1)   | 1.43   |
| (0; 0)    | 20 | 1nM (1nM)     | 0.25 | 1E8 (1E8)    | 1.76   | 0.1 (0.1)   | 1.88   |
| (0; 0)    | 60 | 1nM (1nM)     | 0.40 | 1E8 (9.99E7) | 2.91   | 0.1 (0.1)   | 3.07   |
|           |    |               |      |              |        |             |        |
| (9; 0)    | 1  | 100nM (100nM) | 0.05 | 1E7 (1E7)    | 3.33   | 1 (1)       | 3.35   |
| (58; 0)   | 5  | 100nM (100nM) | 0.12 | 1E7 (1.01E7) | 8.81   | 1 (1.01)    | 8.85   |
| (51; 0)   | 10 | 100nM (100nM) | 0.17 | 1E7 (1.01E7) | 11.53  | 1 (1.01)    | 11.59  |
| (68; 0)   | 20 | 100nM (100nM) | 0.22 | 1E7 (1.02E7) | 18.16  | 1 (1.02)    | 18.24  |
| (77; 0)   | 60 | 100nM (100nM) | 0.23 | 1E7 (1.05E7) | 17.87  | 1 (1.05)    | 17.95  |
|           |    |               |      |              |        |             |        |
| (200; 8)  | 1  | 10μM (10μM)   | 0.05 | 1E6 (1.16E6) | 44.00  | 10 (11.61)  | 44.02  |
| (200; 17) | 5  | 10μM (10μM)   | 0.11 | 1E6 (1.54E6) | 115.22 | 10 (15.39)  | 115.24 |

|           |    |                         |      |               |        |                |        |
|-----------|----|-------------------------|------|---------------|--------|----------------|--------|
| (200; 52) | 10 | 10 $\mu$ M (10 $\mu$ M) | 0.14 | 1E6 (1.28E6)  | 247.86 | 10 (12.84)     | 248.29 |
| (200; 6)  | 20 | 10 $\mu$ M (10 $\mu$ M) | 0.22 | 1E6 (1.08E10) | 285.87 | 10 (1.08E5)    | 285.94 |
| (200; 16) | 60 | 10 $\mu$ M (10 $\mu$ M) | 0.39 | 1E6 (5.38E9)  | 252.64 | 10 (53811.80)  | 252.71 |
|           |    |                         |      |               |        |                |        |
| (200; 13) | 1  | 1mM (1mM)               | 0.05 | 1E5 (1.02E7)  | 55.30  | 100 (10237.89) | 55.30  |
| (200; 14) | 5  | 1mM (1mM)               | 0.11 | 1E5 (9.95E6)  | 55.06  | 100 (9950.64)  | 55.05  |
| (200; 16) | 10 | 1mM (1mM)               | 0.15 | 1E5 (9.68E6)) | 49.20  | 100 (9683.19)  | 49.20  |
| (200; 8)  | 20 | 1mM (1mM)               | 0.20 | 1E5 (9.63E6)  | 55.35  | 100 (9632.49)  | 55.33  |
| (200; 16) | 60 | 1mM (1mM)               | 0.40 | 1E5 (9.98E6)  | 60.23  | 100 (9977.35)  | 60.20  |

## Supplemental Methods

### How to conduct a Monte Carlo Analysis in GraphPad Prism

This analysis will repeat simulations many times, and tabulate selected results. There are essentially 3 steps to follow in order to perform a Monte Carlo analysis:

#### 1. Simulating a data table

To simulate a family of XY data sets with random error, start from any data table or graph, click **Analyze**, open the **Simulate data** category, and then select **Simulate XY Data**.

**X values tab.** This allows you to generate a regular series of X values.

The example described below is performed using the Equation the '**Kinetics of competitive binding**', and forms a small part of our whole analysis.

We chose to simulate X values time (min), using a 30sec start time (i.e. 0.5min, representing offline addition) and generate X values up to 180min, at 20sec intervals (i.e. plus 0.3333min).

These simulations include random scatter, so will produce new results when they are updated.

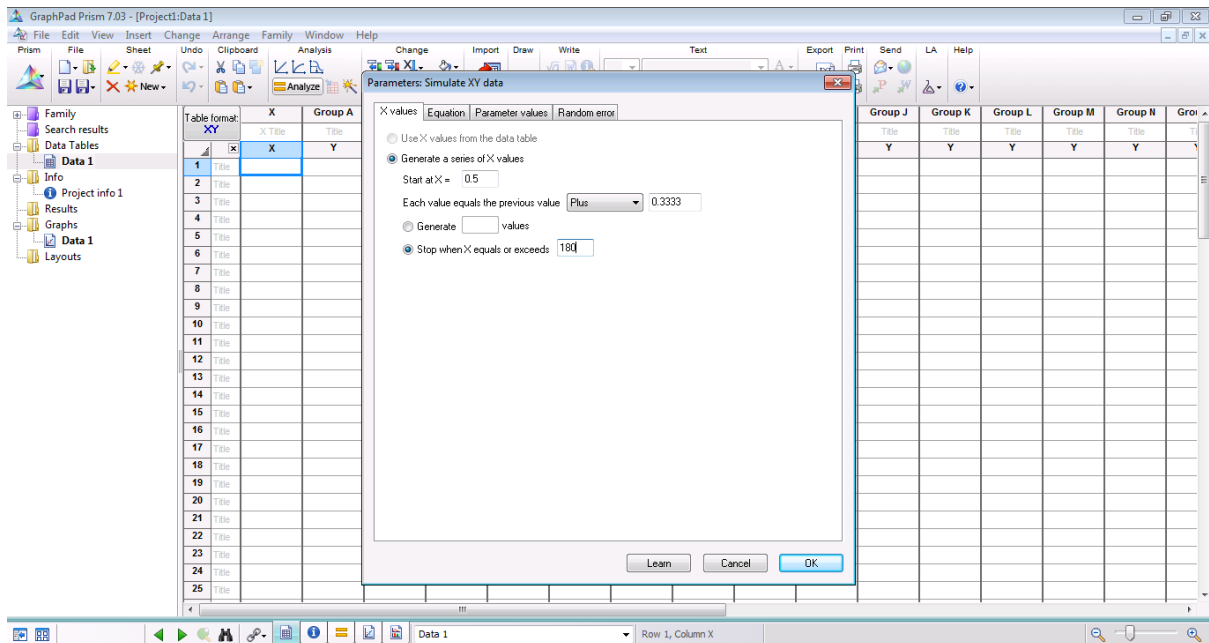

Equation tab. Choose the '**Kinetics of competitive binding**' equation on this tab found listed in '**Binding-Kinetics**' option.

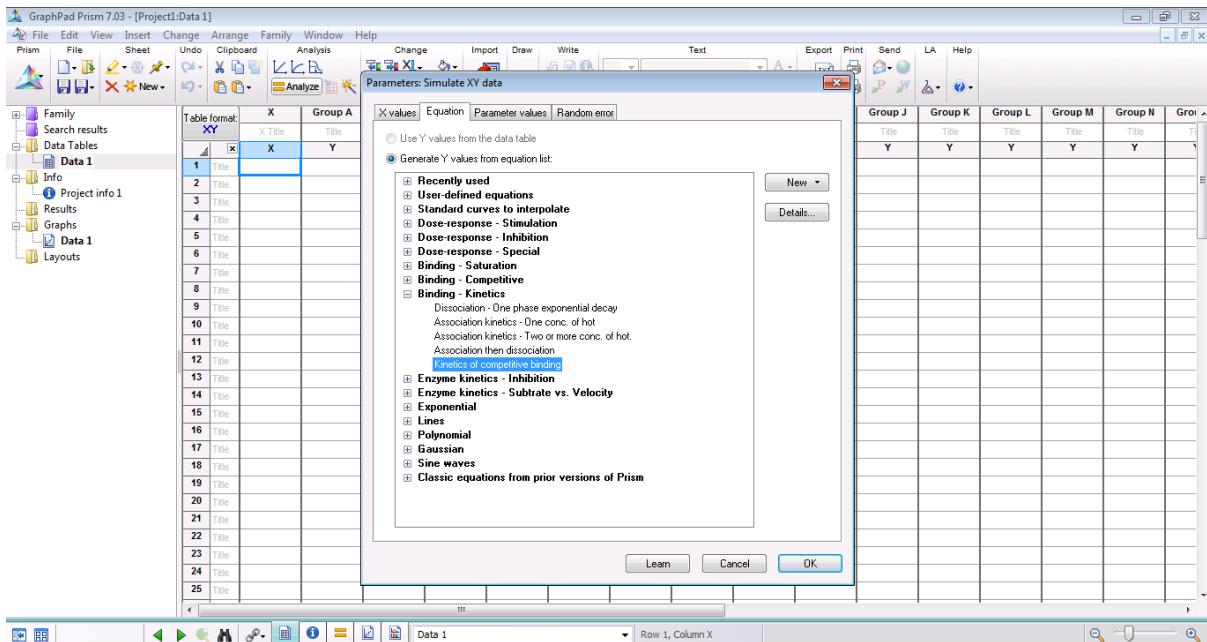

**Parameter values tab.** On top of the tab, choose how many data sets you wish to simulate, and how many replicates each data set will have.

In this example we chose to simulate using one replicate our tracer ( $K_1 = 1e9M^{-1}min^{-1}$ ;  $K_2 = 0.01min^{-1}$ ) in the absence of competitor at a concentration ( $L$ )  $3 * K_d$  ( $0.03nM$ ), Data set A, column title 0 and our tracer in the presence of a competitor ( $K_3 = 1e9M^{-1}min^{-1}$ ,  $K_3$   $0.1min^{-1}$ ), employing five different competitor concentrations ( $I$ ) ranging from 100 to  $1nM * K_d$ , Data set B to F, column titles 100 to 1. Note for simulation input purposes units are omitted.

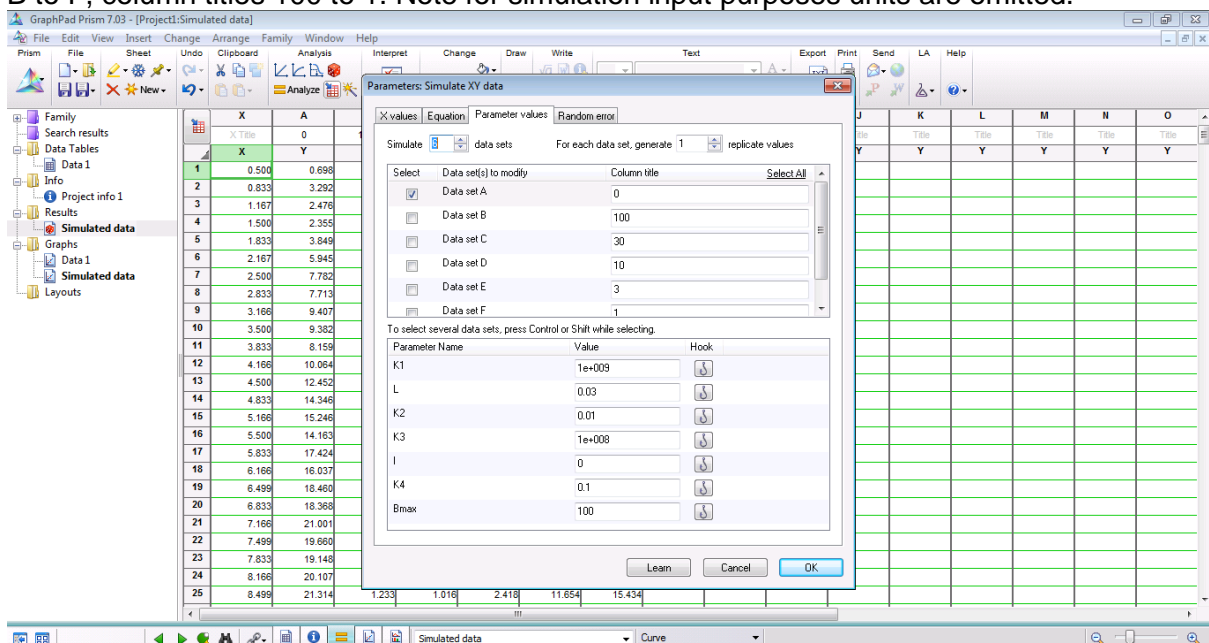

You can choose to simulate multiple data sets (Global fitting), choosing to enter a parameter value for just for one data set (eg. competitor concentrations or  $I$ ), or to enter a parameter that applies to all data sets, or all, curves (eg. the tracer parameters  $K_1$ ,  $K_2$  and  $L$  and the competitor parameters  $K_3$   $K_4$  plus  $B_{max}$ ).

**Random error tab.** There are several methods for generating random scatter (and if desired also adding outliers).



GraphPad Prism allows the user to add random error to the generated Y values by taking each theoretical (i.e. 'correct') value and adding to it a random number taken from a uniformly distributed population with a standard deviation (SD) defined by the user and equivalent at all concentrations. The random error chosen for simulation was Gaussian absolute to directly reflect the pattern of error observed in our experimental data.

We took the decision to run simulations with minimal error (a standard deviation equal to one) reflecting a high quality assay to test the theoretical limitations of the Motulsky-Mahan model rather than being restricted by what we perceive as technical assay limitations.

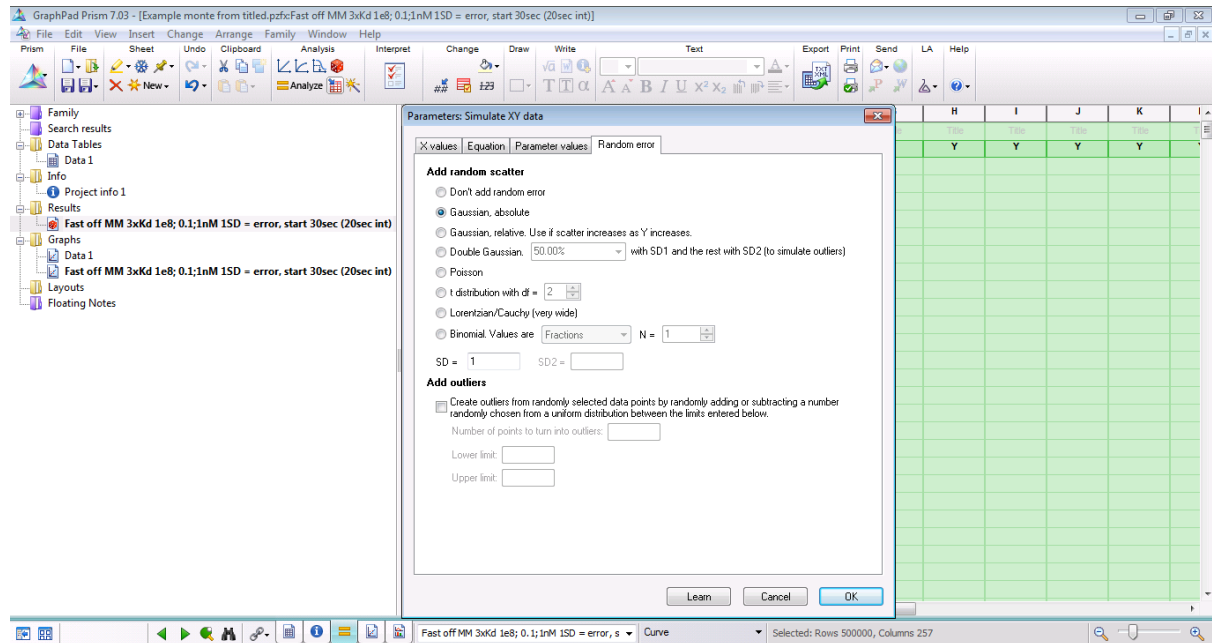

Finally, **title** the 'simulation' as you will likely create several varying one or more parameter at a time.

## 2. Analyze the simulated data set using the equation Kinetics of competitive binding.

To do this click **Analyze**, and choose **XY analyses (Non-linear regression curve fit)**

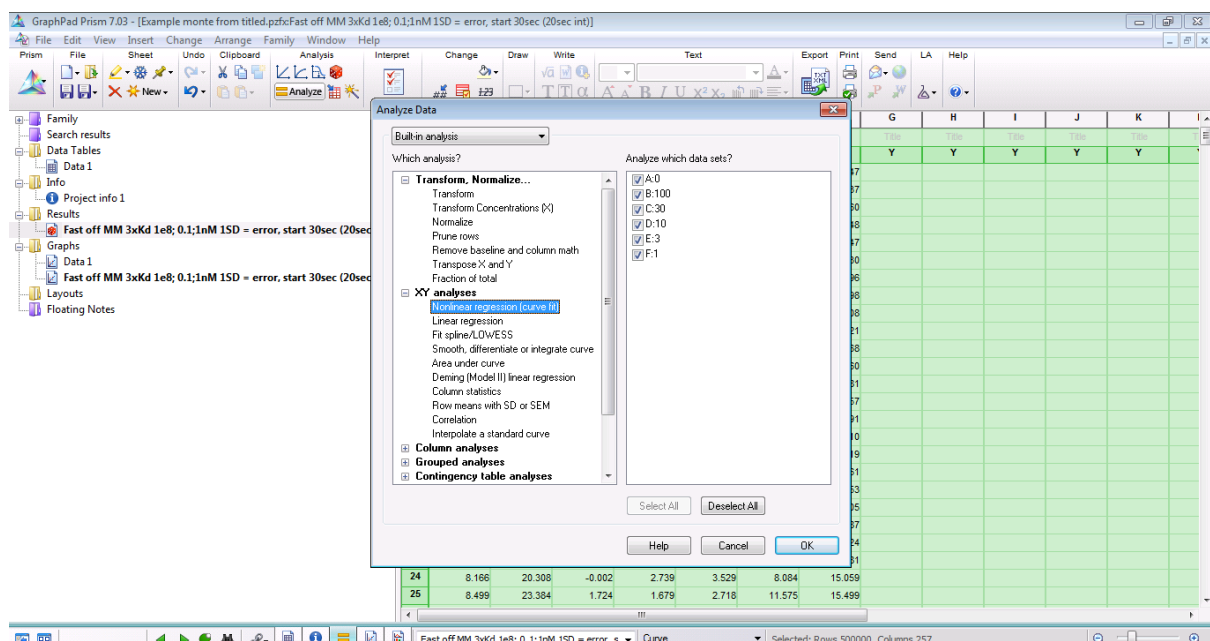

Then choose the **Kinetics of competitive binding** equation on this tab found listed in 'Binding-Kinetics' option.

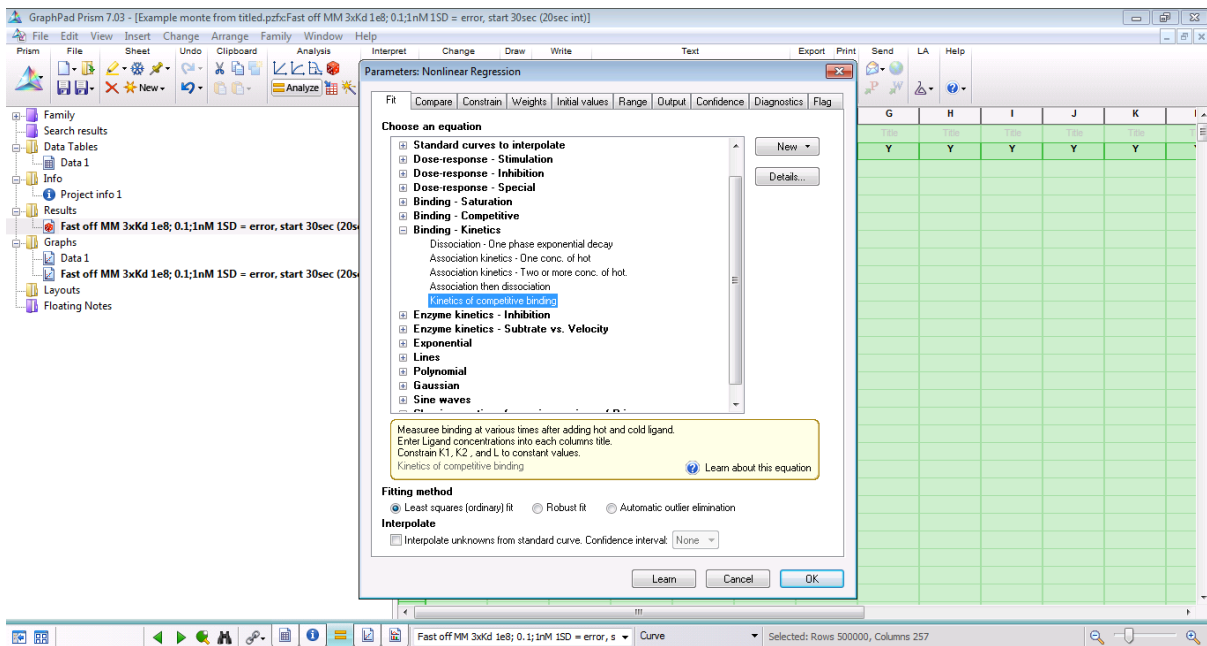

Then click on the **constrain** tab and constrain the parameters of the tracer eg k1, k2 and L, as described above.

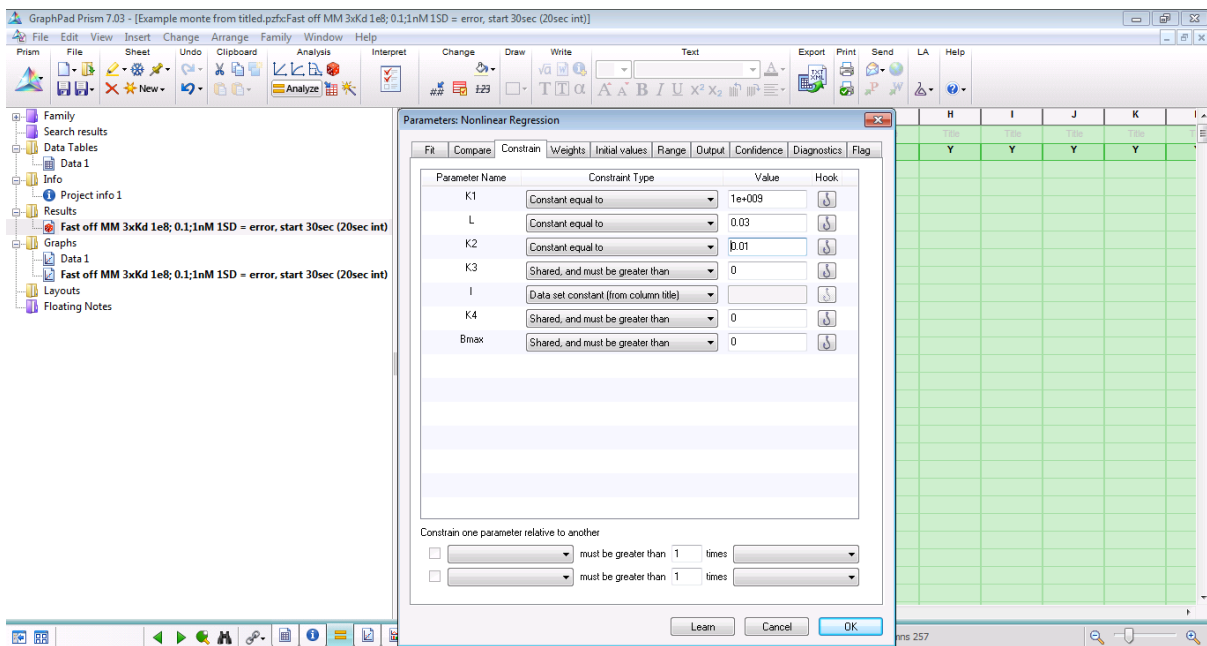

### 3. Perform the Monte-Carlo analysis.

Start from the nonlinear regression **results page**, click **Analyze** and choose **Monte Carlo** simulation.

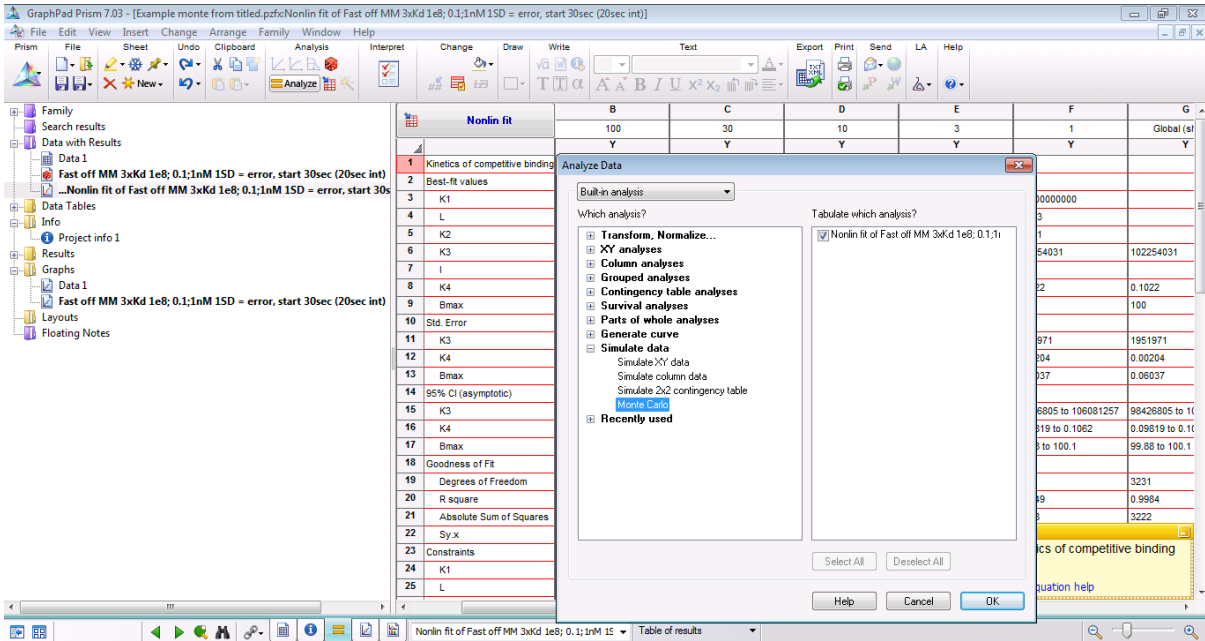

On the first (simulations) tab, choose how many simulations you want Prism to perform. We chose to perform 200 simulations per test condition.

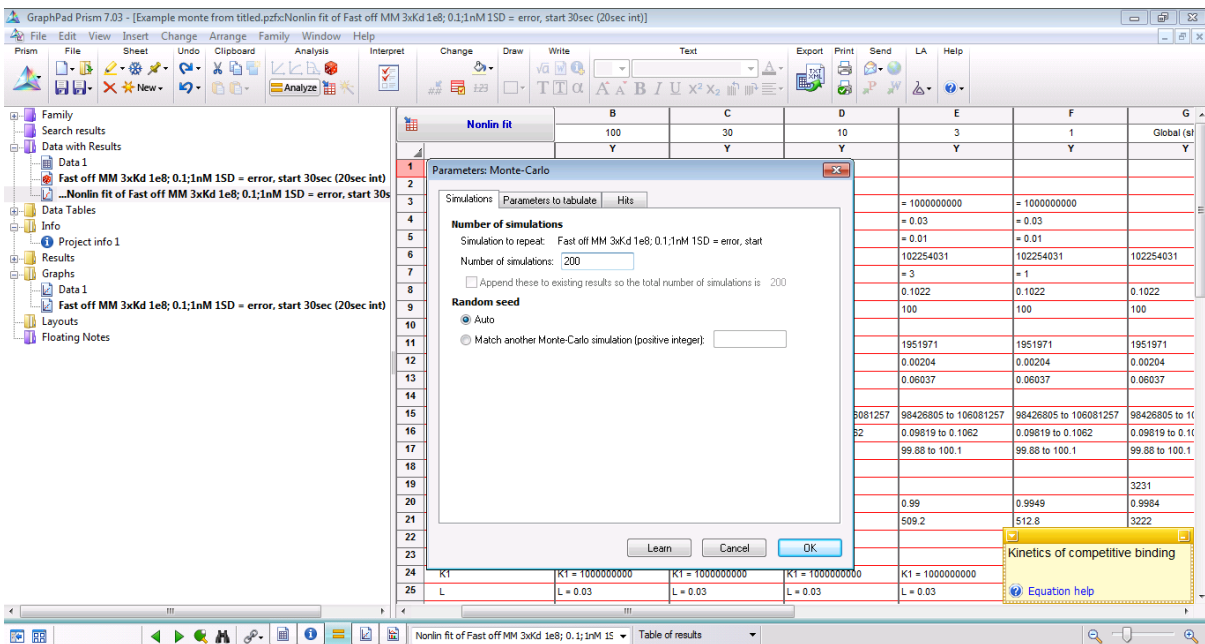

On the **Parameters to tabulate** tab, choose which parameters you want to tabulate. The choice is the list of analysis constants that Prism creates when it analyses the data.

For this example, we chose to tabulate all the **Global (shared) parameters**.

GraphPad Prism 7.03 - [Example monte from titled.pzfc:Nonlin fit of Fast off MM 3xKd 1e8; 0.1;1nM 1SD = error, start 30sec (20sec int)]

Parameters: Monte-Carlo

Simulations Parameters to tabulate Hits

Tabulate parameters from: Nonlin fit of Fast off MM 3xKd 1e8; 0.1;1nM 1SD

- Global (shared)
  - Best fit values
    - K3
    - K4
    - Bmax
  - Std. Error
    - K3
    - K4
    - Bmax
  - Lower 95% confidence limit (asymptotic)
    - K3
    - K4
    - Bmax
  - Upper 95% confidence limit (asymptotic)
    - K3
    - K4
    - Bmax
  - Goodness of Fit

Number of selected parameters: 18

Learn Cancel OK

|    | B   | C               | D               | E               | F               | G          |
|----|-----|-----------------|-----------------|-----------------|-----------------|------------|
| 1  | 100 | 30              | 10              | 3               | 1               | Global (s) |
| 2  | Y   | Y               | Y               | Y               | Y               | Y          |
| 3  |     |                 |                 |                 |                 |            |
| 4  |     |                 |                 |                 |                 |            |
| 5  |     |                 |                 |                 |                 |            |
| 6  |     |                 |                 |                 |                 |            |
| 7  |     |                 |                 |                 |                 |            |
| 8  |     |                 |                 |                 |                 |            |
| 9  |     |                 |                 |                 |                 |            |
| 10 |     |                 |                 |                 |                 |            |
| 11 |     |                 |                 |                 |                 |            |
| 12 |     |                 |                 |                 |                 |            |
| 13 |     |                 |                 |                 |                 |            |
| 14 |     |                 |                 |                 |                 |            |
| 15 |     |                 |                 |                 |                 |            |
| 16 |     |                 |                 |                 |                 |            |
| 17 |     |                 |                 |                 |                 |            |
| 18 |     |                 |                 |                 |                 |            |
| 19 |     |                 |                 |                 |                 |            |
| 20 |     |                 |                 |                 |                 |            |
| 21 |     |                 |                 |                 |                 |            |
| 22 |     |                 |                 |                 |                 |            |
| 23 |     |                 |                 |                 |                 |            |
| 24 | K1  | K1 = 1000000000 | K1 = 1000000000 | K1 = 1000000000 | K1 = 1000000000 |            |
| 25 | L   | L = 0.03        | L = 0.03        | L = 0.03        | L = 0.03        |            |

On the **Hits** tab, you can define a criterion which makes a given simulated results a "hit". We copied all the reported data (Parameters to tabulate) to Excel for further analysis and so chose to report all individual simulations.

GraphPad Prism 7.03 - [Example monte from titled.pzfc:Nonlin fit of Fast off MM 3xKd 1e8; 0.1;1nM 1SD = error, start 30sec (20sec int)]

Parameters: Monte-Carlo

Simulations Parameters to tabulate Hits

Definition of a 'hit'

Tabulate a simulation as a hit when **Both** of these conditions are met:

-- Not defined -- is -- Not defined --

-- Not defined -- is -- Not defined --

Reporting the fraction of simulations that are 'hits'

When calculating the fraction of hits, exclude simulations where:

- The parameter was not determined (blank)
- The fit was flagged as a poor fit (or ambiguous)

Show the fraction of simulations that are hits with a 95%

Method: Wilson/Brown (recommended)

Reporting individual simulations

- Hits
- Not hits
- All simulations

Learn Cancel OK

|    | B   | C               | D               | E               | F               | G          |
|----|-----|-----------------|-----------------|-----------------|-----------------|------------|
| 1  | 100 | 30              | 10              | 3               | 1               | Global (s) |
| 2  | Y   | Y               | Y               | Y               | Y               | Y          |
| 3  |     |                 |                 |                 |                 |            |
| 4  |     |                 |                 |                 |                 |            |
| 5  |     |                 |                 |                 |                 |            |
| 6  |     |                 |                 |                 |                 |            |
| 7  |     |                 |                 |                 |                 |            |
| 8  |     |                 |                 |                 |                 |            |
| 9  |     |                 |                 |                 |                 |            |
| 10 |     |                 |                 |                 |                 |            |
| 11 |     |                 |                 |                 |                 |            |
| 12 |     |                 |                 |                 |                 |            |
| 13 |     |                 |                 |                 |                 |            |
| 14 |     |                 |                 |                 |                 |            |
| 15 |     |                 |                 |                 |                 |            |
| 16 |     |                 |                 |                 |                 |            |
| 17 |     |                 |                 |                 |                 |            |
| 18 |     |                 |                 |                 |                 |            |
| 19 |     |                 |                 |                 |                 |            |
| 20 |     |                 |                 |                 |                 |            |
| 21 |     |                 |                 |                 |                 |            |
| 22 |     |                 |                 |                 |                 |            |
| 23 |     |                 |                 |                 |                 |            |
| 24 | K1  | K1 = 1000000000 | K1 = 1000000000 | K1 = 1000000000 | K1 = 1000000000 |            |
| 25 | L   | L = 0.03        | L = 0.03        | L = 0.03        | L = 0.03        |            |

Full instructions can be found in the online Prism guide found through the following link under Simulating data and Monte Carlo simulations  
[https://www.graphpad.com/guides/prism/7/user-guide/index.htm?simulating\\_data.htm](https://www.graphpad.com/guides/prism/7/user-guide/index.htm?simulating_data.htm)

  
 Example Monte Carlo file.pzfc
